# Supplementary material for: Copper-Binding Domain Variation in a Novel Murine Lysyl Oxidase Model Produces Structurally Inferior Aortic Elastic Fibers Whose Failure Is Modified by Age, Sex, and Blood Pressure
Source: Int J Mol Sci. 2022 Jun 17;23(12):6749. doi: 10.3390/ijms23126749 (PMC9223555; doi:10.3390/ijms23126749)
Supplement: Supplementary file 1 [file ijms-23-06749-s001.zip]

Archive with 14 entries (14 files):
- Supplemental Table S2.xlsx
- Supplemental Table S3.xlsx
- Supplemental Table S4.xlsx
- Supplemental Table S5.xlsx
- Supplemental Video S1.mov
- Supplemental Video S2.mov
- Supplemental Video S3.mov
- Supplemental Video S4.mov
- Supplemental Video S5.mov
- Supplemental Video S6.mov
- Supplemental Video S7.mov
- Supplemental Video S8.mov
- Supplemental Video S9.mov
- Tsang_IJMS Supplementals.pdf
