# Supplementary material for: Copper-Binding Domain Variation in a Novel Murine Lysyl Oxidase Model Produces Structurally Inferior Aortic Elastic Fibers Whose Failure Is Modified by Age, Sex, and Blood Pressure
Source: Int J Mol Sci. 2022 Jun 17;23(12):6749. doi: 10.3390/ijms23126749 (PMC9223555; doi:10.3390/ijms23126749)
Supplement: Supplementary file 1 [file ijms-23-06749-s001.zip › Supplemental Table S2.xlsx]

## Sheet: DEseq_res_0.58lfc_0.1padj
Supplemental Table II: Differences between Lox+/+ and Lox+/C285F gene expression.
genes selected for +/- 1.5-fold change (0.58 Log2 fold change) and FDR<10%
Gene Symbol	Ensembl Gene ID	direction	log2 Fold Change	p-value	FDR adjusted q-value	Base Mean expression
H2-Bl	ENSMUSG00000073406.10	UP	5.42243	0.00033625	0.0106023	16.677
Gm8810	ENSMUSG00000091373.4	UP	5.21919	0.00518432	0.0613517	23.8689
Trim10	ENSMUSG00000073400.6	UP	2.82945	9.42583e-06	0.000740386	10.0505
Serpine1	ENSMUSG00000037411.10	UP	2.6136	0.00015132	0.00599607	2355.07
Fos	ENSMUSG00000021250.13	UP	2.34493	0.000389517	0.0116409	292.158
Ankrd1	ENSMUSG00000024803.8	UP	2.24915	1.39096e-06	0.000185656	41.602
Ptgs2	ENSMUSG00000032487.8	UP	2.17611	0.00121137	0.0245179	98.0032
Hspa1b	ENSMUSG00000090877.3	UP	2.12786	0.000396873	0.0117968	4846.78
Chrna1	ENSMUSG00000027107.3	UP	2.05868	0.00022698	0.00797014	10.7358
Tnfaip6	ENSMUSG00000053475.5	UP	1.99227	1.49238e-06	0.000197707	342.632
Hspa1a	ENSMUSG00000091971.3	UP	1.98709	0.000712703	0.017379	4849.95
Cyr61	ENSMUSG00000028195.4	UP	1.9338	0.00903243	0.0877634	1687.19
Fosb	ENSMUSG00000003545.3	UP	1.92051	0.00234265	0.0373658	86.648
Ereg	ENSMUSG00000029377.5	UP	1.88342	3.24288e-10	4.42827e-07	140.825
Rgs4	ENSMUSG00000038530.11	UP	1.83543	0.00575063	0.0662031	1091.33
Gm20481	ENSMUSG00000092609.1	UP	1.8168	0.00170696	0.0308889	1156.19
Hbegf	ENSMUSG00000024486.5	UP	1.80914	0.00308288	0.0452722	419.702
Gm15270	ENSMUSG00000087400.8	UP	1.77805	8.04513e-07	0.000125278	5285.45
Gpr176	ENSMUSG00000040133.2	UP	1.76449	0.00699228	0.0749107	9.96494
Abra	ENSMUSG00000042895.5	UP	1.7612	3.02131e-08	1.16596e-05	116.992
Nr4a3	ENSMUSG00000028341.9	UP	1.76113	0.000330187	0.0105053	138.93
Tgtp2	ENSMUSG00000078921.3	UP	1.75926	3.49208e-05	0.0020527	27.9028
Ctgf	ENSMUSG00000019997.11	UP	1.74688	1.04154e-06	0.000149108	18607.4
Ifit1	ENSMUSG00000034459.8	UP	1.73021	0.000326382	0.0104331	14.6624
Apol11b	ENSMUSG00000091694.8	UP	1.72861	0.00681649	0.0738294	10.5135
Tnfrsf12a	ENSMUSG00000023905.14	UP	1.71737	7.55982e-07	0.000119839	938.209
AC158990.1	ENSMUSG00000114165.1	UP	1.70115	0.000210569	0.00752115	13.6746
Rnd3	ENSMUSG00000017144.8	UP	1.69628	8.37468e-07	0.000129229	661.518
Myl7	ENSMUSG00000020469.8	UP	1.68989	2.53412e-05	0.00161239	39.1966
Ncan	ENSMUSG00000002341.8	UP	1.6466	0.00172835	0.0311489	9.37014
Spry4	ENSMUSG00000024427.6	UP	1.61873	0.00678046	0.0736188	104.891
Rcan1	ENSMUSG00000022951.15	UP	1.61088	1.03528e-11	4.59458e-08	682.981
Cdkn2b	ENSMUSG00000073802.4	UP	1.59989	6.35591e-06	0.000566986	22.1417
Sele	ENSMUSG00000026582.6	UP	1.59982	0.000291592	0.00948049	33.7179
Tgtp1	ENSMUSG00000078922.9	UP	1.58828	0.000278207	0.00921405	23.044
Gm14705	ENSMUSG00000086676.2	UP	1.5837	0.000768784	0.0181834	12.7098
Atf3	ENSMUSG00000026628.13	UP	1.54342	0.00340987	0.0475904	299.345
Pbk	ENSMUSG00000022033.9	UP	1.52772	0.000344078	0.0107726	28.6911
Diras2	ENSMUSG00000047842.7	UP	1.51585	9.87698e-10	8.76681e-07	101.532
Gm38359	ENSMUSG00000103317.1	UP	1.51276	0.00321831	0.0465239	28.094
Lypd1	ENSMUSG00000026344.9	UP	1.50614	3.13079e-10	4.42827e-07	88.1231
Fbxo30	ENSMUSG00000047648.13	UP	1.48831	5.49223e-05	0.00285082	2121.71
Egr2	ENSMUSG00000037868.15	UP	1.48122	0.00449391	0.056015	10.1794
Map2k3os	ENSMUSG00000042549.10	UP	1.45605	8.63005e-05	0.00397924	26.6425
Bmp2	ENSMUSG00000027358.6	UP	1.44858	6.42564e-08	1.90708e-05	78.1074
Syt4	ENSMUSG00000024261.5	UP	1.43144	0.00330637	0.0471065	15.4125
Lix1	ENSMUSG00000047786.12	UP	1.41906	0.00199739	0.0338661	11.6309
Dnajb4	ENSMUSG00000028035.13	UP	1.40275	0.0029049	0.0436385	4448.13
Ihh	ENSMUSG00000006538.12	UP	1.39707	0.00312505	0.0457899	40.7313
Stil	ENSMUSG00000028718.16	UP	1.3833	9.57011e-10	8.76681e-07	53.6743
Cpb1	ENSMUSG00000011463.5	UP	1.38328	0.002525	0.039562	14.2007
Gpr39	ENSMUSG00000026343.6	UP	1.37844	4.78438e-09	2.73975e-06	97.9124
Nuf2	ENSMUSG00000026683.14	UP	1.37399	0.00299201	0.0443728	19.4552
Fam46a	ENSMUSG00000032265.14	UP	1.3701	1.81971e-05	0.00121442	1326.84
Htr2a	ENSMUSG00000034997.5	UP	1.35473	3.90655e-06	0.00039628	121.283
Drd1	ENSMUSG00000021478.6	UP	1.34995	0.0112285	0.0991534	20.11
Gm12057.1	ENSMUSG00000101716.1	UP	1.3427	0.00121507	0.0245248	15.863
Plk3	ENSMUSG00000028680.14	UP	1.32717	5.61767e-05	0.00289058	39.0257
Gm3571	ENSMUSG00000090610.3	UP	1.31757	5.95189e-05	0.00302745	43.7983
Cdca2	ENSMUSG00000048922.18	UP	1.30591	0.00100014	0.0216635	17.7861
Gm37060	ENSMUSG00000103808.1	UP	1.30357	0.00906717	0.0878485	11.9848
Ifi47	ENSMUSG00000078920.3	UP	1.2946	1.97672e-06	0.000241313	48.2143
Spc25	ENSMUSG00000005233.16	UP	1.28241	0.00175229	0.0312899	16.6339
Gfod1	ENSMUSG00000051335.6	UP	1.27813	4.1001e-07	7.82634e-05	218.525
Rnd1	ENSMUSG00000054855.13	UP	1.27564	0.000439347	0.0127439	32.9026
Kank4	ENSMUSG00000035407.8	UP	1.27078	9.85279e-08	2.61489e-05	73.8302
Gypa	ENSMUSG00000051839.7	UP	1.25907	0.00282801	0.0429452	25.2295
Frmpd4	ENSMUSG00000049176.14	UP	1.24808	7.66253e-10	8.00149e-07	76.5898
Egr1	ENSMUSG00000038418.7	UP	1.23546	3.24333e-09	2.21245e-06	307.575
Actr3b	ENSMUSG00000056367.14	UP	1.2249	0.00340118	0.0475751	34.3699
Plau	ENSMUSG00000021822.3	UP	1.2186	1.71928e-08	7.35583e-06	87.6794
B3gnt2	ENSMUSG00000051650.10	UP	1.21514	1.51142e-07	3.35384e-05	373.662
Gadd45b	ENSMUSG00000015312.9	UP	1.21504	3.36503e-09	2.21245e-06	195.424
Hsph1	ENSMUSG00000029657.15	UP	1.20726	0.000414003	0.0121477	623.958
Homer1	ENSMUSG00000007617.18	UP	1.20483	1.57912e-06	0.000204616	195.884
Trib2	ENSMUSG00000020601.8	UP	1.19886	3.39042e-08	1.28057e-05	656.2
Gm13502	ENSMUSG00000083287.4	UP	1.19866	0.00871038	0.086095	27.9818
Gdf6	ENSMUSG00000051279.2	UP	1.19524	0.00132007	0.0259225	21.99
Gm8141	ENSMUSG00000100025.1	UP	1.18758	0.00312348	0.0457899	24.8715
Gm44357	ENSMUSG00000105238.1	UP	1.17811	7.70161e-05	0.00364551	28.7489
Gm37905	ENSMUSG00000103072.1	UP	1.17361	0.00662684	0.0726771	23.4146
Gm10501	ENSMUSG00000073415.4	UP	1.16799	0.0110711	0.0982671	277.041
Cela1	ENSMUSG00000023031.7	UP	1.16648	0.0050097	0.0602114	13.709
Gm19610	ENSMUSG00000107350.1	UP	1.15808	0.00195339	0.0332789	19.1132
Col19a1	ENSMUSG00000026141.13	UP	1.15649	0.0055365	0.0641959	23.7333
Eef1e1	ENSMUSG00000001707.8	UP	1.12722	0.000105749	0.00464667	64.3569
Hrasls	ENSMUSG00000022525.13	UP	1.12538	0.00360868	0.0490961	16.4975
Gm6634	ENSMUSG00000097252.1	UP	1.12196	0.000125989	0.00520128	33.1772
Amd-ps4	ENSMUSG00000019836.5	UP	1.1212	5.45744e-07	9.67585e-05	70.7317
Gm5532	ENSMUSG00000073535.5	UP	1.12073	0.000272137	0.00906376	42.3656
Cyp51	ENSMUSG00000001467.5	UP	1.11927	0.00460252	0.0570559	395.696
Sytl5	ENSMUSG00000054453.11	UP	1.11327	3.14635e-06	0.000342235	64.7863
Sdf2l1	ENSMUSG00000022769.7	UP	1.11165	0.000554899	0.0148352	41.0937
Pclaf	ENSMUSG00000040204.6	UP	1.11021	0.0016746	0.0305211	28.9488
9130008F23Rik	ENSMUSG00000054951.2	UP	1.1039	1.93552e-05	0.00128206	48.5061
Lbh	ENSMUSG00000024063.12	UP	1.10073	1.05795e-06	0.000150246	767.283
Kntc1	ENSMUSG00000029414.11	UP	1.0978	0.00610561	0.0683829	23.511
Gm5511	ENSMUSG00000100615.1	UP	1.09735	0.00242869	0.0383577	21.9153
Gm37273	ENSMUSG00000103288.1	UP	1.09574	0.00998156	0.0930817	26.3194
Hmmr	ENSMUSG00000020330.16	UP	1.09242	0.00720453	0.075947	25.5333
Myoz2	ENSMUSG00000028116.13	UP	1.09017	1.26796e-08	6.08345e-06	425.9
Fdps	ENSMUSG00000059743.12	UP	1.09001	6.75498e-06	0.000596589	367.904
Mybpc3	ENSMUSG00000002100.15	UP	1.08352	0.00290563	0.0436385	28.9432
Dusp5	ENSMUSG00000034765.6	UP	1.07595	6.5159e-05	0.00326752	35.171
Gm8355	ENSMUSG00000093798.2	UP	1.07539	1.92497e-08	7.94698e-06	2438.7
Gm18853	ENSMUSG00000098934.1	UP	1.06947	0.00359142	0.0490045	25.6883
Ifi27l2a	ENSMUSG00000079017.3	UP	1.0693	1.37622e-05	0.000985106	65.8508
Cd83	ENSMUSG00000015396.4	UP	1.06919	0.00943281	0.0904164	17.4008
Btg1	ENSMUSG00000036478.8	UP	1.0654	5.64315e-10	6.26107e-07	1023.45
Dhrs9	ENSMUSG00000027068.6	UP	1.06188	2.64156e-05	0.00166879	86.208
Pcdh18	ENSMUSG00000037892.13	UP	1.06062	8.39483e-06	0.00068993	429.128
Car2	ENSMUSG00000027562.12	UP	1.05955	0.000841841	0.0193338	48.6077
Rtp4	ENSMUSG00000033355.6	UP	1.05507	0.000841933	0.0193338	28.1998
Gm7816	ENSMUSG00000083261.4	UP	1.05499	7.26924e-06	0.000624754	127.676
Gm44367	ENSMUSG00000105014.1	UP	1.05211	0.00020875	0.00748489	44.425
Serpinb8	ENSMUSG00000026315.13	UP	1.05026	4.6023e-07	8.47537e-05	124.359
Bdnf	ENSMUSG00000048482.14	UP	1.04989	5.27504e-08	1.64285e-05	213.285
Bambi	ENSMUSG00000024232.1	UP	1.04812	6.67612e-07	0.000109736	616.417
Gm7899	ENSMUSG00000103823.1	UP	1.04741	1.77398e-06	0.000224941	173.277
Mir3074-1	ENSMUSG00000092741.2	UP	1.04408	0.000208863	0.00748489	58.2256
Spc24	ENSMUSG00000074476.6	UP	1.04402	0.00971292	0.0917148	16.3686
Gm37348	ENSMUSG00000102972.1	UP	1.04393	2.57141e-06	0.000298351	168.763
Hspa8	ENSMUSG00000015656.17	UP	1.04384	1.07646e-07	2.65407e-05	20009.1
Mir24-1	ENSMUSG00000105904.1	UP	1.04274	0.000441411	0.0127439	37.7774
Ptrh1	ENSMUSG00000053746.8	UP	1.04136	0.00170429	0.0308889	22.8832
Cd109	ENSMUSG00000046186.8	UP	1.04051	2.94563e-15	5.22909e-11	1126.02
Gm29491	ENSMUSG00000100393.1	UP	1.0373	4.20282e-05	0.00236103	46.1409
Gm15459	ENSMUSG00000100801.1	UP	1.03412	3.70237e-08	1.31256e-05	6625.51
2210407C18Rik	ENSMUSG00000037145.14	UP	1.03371	1.81386e-06	0.000228366	690.883
Gm26825	ENSMUSG00000097554.1	UP	1.03338	3.77086e-08	1.31256e-05	6628.87
Hist1h2aj	ENSMUSG00000080076.4	UP	1.03264	0.000145798	0.00585567	61.1117
Ell2	ENSMUSG00000001542.7	UP	1.02992	1.40102e-07	3.22998e-05	454.406
Gm18852	ENSMUSG00000099241.2	UP	1.02203	0.00585204	0.0667215	25.9433
Epha2	ENSMUSG00000006445.3	UP	1.01782	0.000445338	0.0128338	57.676
Maff	ENSMUSG00000042622.13	UP	1.01309	1.44596e-05	0.00102266	194.284
Adcy8	ENSMUSG00000022376.8	UP	1.01106	0.00396251	0.0520285	29.0969
CT009757.3	ENSMUSG00000113472.1	UP	1.00512	0.000120471	0.00510045	193.05
Gm44484	ENSMUSG00000106203.1	UP	1.00496	0.000254619	0.00871644	53.5915
Racgap1	ENSMUSG00000023015.13	UP	1.00333	0.000101181	0.00451298	48.015
Amd-ps3	ENSMUSG00000060096.4	UP	1.00031	7.49775e-09	3.91471e-06	167.45
Dut	ENSMUSG00000027203.15	UP	0.998378	1.07442e-05	0.000808183	195.965
Gm8337	ENSMUSG00000100033.1	UP	0.997676	4.70268e-06	0.000453707	150.539
Sost	ENSMUSG00000001494.6	UP	0.996649	0.00188175	0.0325266	3478.42
Vtcn1	ENSMUSG00000051076.8	UP	0.995246	3.04877e-07	5.88279e-05	107.994
Plaur	ENSMUSG00000046223.10	UP	0.994373	4.10746e-05	0.00232268	88.6667
Nfil3	ENSMUSG00000056749.7	UP	0.992568	0.00718457	0.075947	608.307
Net1	ENSMUSG00000021215.15	UP	0.99235	0.00979305	0.0921772	2427.94
Dusp6	ENSMUSG00000019960.8	UP	0.988577	9.88589e-08	2.61489e-05	225.905
Nptx2	ENSMUSG00000059991.7	UP	0.987834	0.000497227	0.0137489	57.0368
Gm14519	ENSMUSG00000082838.1	UP	0.986745	0.0103708	0.0948004	16.2854
Gm6335	ENSMUSG00000083392.1	UP	0.986443	0.00129891	0.0257634	40.2137
Fst	ENSMUSG00000021765.8	UP	0.984872	9.48805e-08	2.61489e-05	156.962
Gm44359	ENSMUSG00000105924.1	UP	0.984076	0.00117473	0.0241642	43.6571
Hspa4l	ENSMUSG00000025757.12	UP	0.982784	1.83399e-06	0.000229274	318.221
AC161252.3	ENSMUSG00000114607.1	UP	0.982595	0.0032665	0.0468014	98.641
1700061H18Rik	ENSMUSG00000084948.1	UP	0.982173	0.000525778	0.0142533	91.9334
AC125311.2	ENSMUSG00000115662.1	UP	0.980578	2.83728e-05	0.00176728	332.376
Gm6210	ENSMUSG00000107951.1	UP	0.973179	1.04584e-07	2.61489e-05	1277.89
Cldn3	ENSMUSG00000070473.4	UP	0.968283	2.67794e-06	0.000306304	107.578
Itih2	ENSMUSG00000037254.18	UP	0.964789	1.08564e-05	0.000813173	449.073
Prc1	ENSMUSG00000038943.16	UP	0.963232	1.55577e-06	0.000203074	100.669
Ccdc68	ENSMUSG00000038903.13	UP	0.960392	4.91897e-05	0.00265415	277.205
Gm15542	ENSMUSG00000083396.1	UP	0.956308	7.28504e-06	0.000624754	333.806
Coq10b	ENSMUSG00000025981.13	UP	0.956285	7.27705e-06	0.000624754	575.46
Actn2	ENSMUSG00000052374.15	UP	0.95422	0.00142888	0.0272162	42.9979
Tmem267	ENSMUSG00000074634.12	UP	0.954209	0.000113375	0.00492984	83.9945
Amd2	ENSMUSG00000063953.3	UP	0.948025	1.36162e-08	6.25377e-06	430.602
Rarres1	ENSMUSG00000049404.7	UP	0.947172	0.000845772	0.0193338	31.2271
Gm44390	ENSMUSG00000104608.1	UP	0.945937	0.00131071	0.0258246	58.9708
Fgf16	ENSMUSG00000031230.3	UP	0.94589	0.000804298	0.0188115	37.3209
Hist1h2ab	ENSMUSG00000061615.2	UP	0.944842	0.000271978	0.00906376	87.6796
Kcne4	ENSMUSG00000047330.8	UP	0.938515	3.1617e-06	0.000342235	262.746
Zfp72	ENSMUSG00000069184.4	UP	0.937713	0.000216281	0.00767884	50.3922
Wtip	ENSMUSG00000036459.15	UP	0.936402	7.85158e-08	2.28494e-05	742.777
P4ha1	ENSMUSG00000019916.14	UP	0.935791	1.95204e-06	0.000240643	953.991
Ptgir	ENSMUSG00000043017.9	UP	0.935427	0.0106479	0.095999	18.2394
Ptger3	ENSMUSG00000040016.16	UP	0.926737	0.00063039	0.0161017	35.2349
Tiam2	ENSMUSG00000023800.15	UP	0.926049	0.00751524	0.0778813	434.386
Gm43738	ENSMUSG00000105204.1	UP	0.924319	1.54421e-06	0.000203058	432.478
AL672049.1	ENSMUSG00000106362.1	UP	0.918442	0.00449647	0.056015	31.7705
Lmnb2	ENSMUSG00000062075.13	UP	0.917833	0.00157484	0.0291215	62.4931
Slc4a1	ENSMUSG00000006574.15	UP	0.917496	0.00334421	0.0473949	108.671
Tnfrsf11b	ENSMUSG00000063727.3	UP	0.91745	1.54419e-05	0.001075	72.2825
Lmcd1	ENSMUSG00000057604.9	UP	0.916388	9.30578e-12	4.59458e-08	1994.29
1700030C12Rik	ENSMUSG00000086459.2	UP	0.91473	0.0036127	0.0490961	32.5523
Gm37488	ENSMUSG00000104125.1	UP	0.91393	7.07406e-05	0.00346049	107.738
Pop1	ENSMUSG00000022325.14	UP	0.913398	0.000765519	0.0181435	37.324
Gm42547	ENSMUSG00000106990.1	UP	0.906337	0.0065508	0.0720506	28.9822
Gm6505	ENSMUSG00000070522.4	UP	0.902968	0.0001091	0.00475857	52.4482
Hist1h2ai	ENSMUSG00000071516.2	UP	0.901443	0.000606326	0.0156902	78.8013
Filip1l	ENSMUSG00000043336.14	UP	0.900495	2.93165e-06	0.000324431	4000.36
Galnt6os	ENSMUSG00000090062.1	UP	0.898571	0.00014431	0.00581984	85.2245
Gm4524	ENSMUSG00000090257.1	UP	0.898421	0.000287843	0.00944355	54.5946
Gfra2	ENSMUSG00000022103.10	UP	0.891759	0.000183803	0.00678008	63.3097
Pxdc1	ENSMUSG00000021411.16	UP	0.888397	3.71215e-10	4.70701e-07	888.94
Tpx2	ENSMUSG00000027469.16	UP	0.888315	0.000495524	0.0137446	53.4722
Baz1a	ENSMUSG00000035021.13	UP	0.883729	0.00365137	0.0493065	98.5401
Slc22a2	ENSMUSG00000040966.9	UP	0.883503	0.0012125	0.0245179	34.7637
Hectd2os	ENSMUSG00000087579.7	UP	0.880072	0.00061618	0.015807	98.9736
Slfn9	ENSMUSG00000069793.12	UP	0.878973	0.0043475	0.0547964	39.1054
Gm28048	ENSMUSG00000098650.1	UP	0.877777	2.9591e-07	5.77252e-05	551.905
Spry2	ENSMUSG00000022114.5	UP	0.877536	0.000251896	0.00866602	131.884
Wif1	ENSMUSG00000020218.11	UP	0.869276	5.23532e-08	1.64285e-05	201.653
P3h2	ENSMUSG00000038168.5	UP	0.868737	0.000154227	0.00605717	144.238
Gm5844	ENSMUSG00000082896.1	UP	0.866752	4.26695e-06	0.000423167	310.332
Prss23	ENSMUSG00000039405.7	UP	0.866598	4.10518e-08	1.38874e-05	1404.45
Eef1akmt4	ENSMUSG00000115219.1	UP	0.865368	0.00151548	0.0284385	37.5495
Amd1	ENSMUSG00000075232.5	UP	0.864645	1.03404e-07	2.61489e-05	811.237
Ms4a4d	ENSMUSG00000024678.6	UP	0.859307	0.00298812	0.0443728	45.1984
Acan	ENSMUSG00000030607.7	UP	0.858578	9.36335e-06	0.000738748	928.937
Nox4	ENSMUSG00000030562.17	UP	0.857823	0.00628172	0.0698703	845.262
Vcam1	ENSMUSG00000027962.14	UP	0.856487	1.58234e-07	3.46786e-05	355.848
Gm3555	ENSMUSG00000089791.1	UP	0.856116	0.000391065	0.0116675	51.2326
Ptprz1	ENSMUSG00000068748.7	UP	0.854436	3.62347e-09	2.21806e-06	1478.39
Haus8	ENSMUSG00000035439.13	UP	0.852566	5.90253e-05	0.00301965	493.655
Gm7451	ENSMUSG00000109489.1	UP	0.849737	0.00893526	0.0870814	25.8888
Six4	ENSMUSG00000034460.9	UP	0.849717	4.50959e-05	0.00248616	218.741
Anxa1	ENSMUSG00000024659.14	UP	0.849116	4.47487e-07	8.36188e-05	1720.25
Gm44486	ENSMUSG00000105433.1	UP	0.84608	0.00784123	0.0804145	38.5777
Fcna	ENSMUSG00000026938.10	UP	0.844062	0.00292642	0.0438737	64.3557
P2rx1	ENSMUSG00000020787.14	UP	0.843881	0.00196922	0.0334601	138.953
Gm44394	ENSMUSG00000104771.1	UP	0.843577	0.00802742	0.0818516	35.3989
Cacybp	ENSMUSG00000014226.10	UP	0.840202	5.28275e-05	0.00279105	323.112
Nedd9	ENSMUSG00000021365.15	UP	0.839174	1.51211e-05	0.00106099	2607.73
Banp	ENSMUSG00000025316.16	UP	0.836983	0.000140641	0.00571319	144.357
Scx	ENSMUSG00000034161.7	UP	0.836136	8.57341e-06	0.000698143	197.805
Hist1h2ad	ENSMUSG00000071478.6	UP	0.83594	0.00190457	0.0327298	90.1731
Gm42674	ENSMUSG00000105518.1	UP	0.833903	0.000119678	0.00509476	764.086
Fam26e	ENSMUSG00000049872.8	UP	0.833353	1.37391e-08	6.25377e-06	639.054
Prss23os	ENSMUSG00000030623.4	UP	0.831417	6.44573e-08	1.90708e-05	822.508
Kpna2	ENSMUSG00000018362.14	UP	0.831223	6.97766e-09	3.75356e-06	353.975
Fhl3	ENSMUSG00000032643.12	UP	0.831161	0.000338469	0.010652	108.191
Hist1h2ak	ENSMUSG00000063021.3	UP	0.829642	0.00170277	0.0308889	80.9792
S100a4	ENSMUSG00000001020.8	UP	0.827987	0.000101013	0.00451298	887.614
Gm17501	ENSMUSG00000097183.2	UP	0.827826	0.000523494	0.0142313	44.8433
Tmem97	ENSMUSG00000037278.9	UP	0.8269	0.000548478	0.0147301	124.918
Fgf7	ENSMUSG00000027208.14	UP	0.82561	0.00361999	0.0490961	29.5205
Hist1h2af	ENSMUSG00000061991.2	UP	0.818753	0.00253125	0.0396251	89.7178
Vgll3	ENSMUSG00000091243.2	UP	0.815785	4.61857e-05	0.00253052	585.105
Cdk1	ENSMUSG00000019942.13	UP	0.815771	0.00343742	0.0477847	31.3747
Gm44297	ENSMUSG00000105109.1	UP	0.815062	0.00521624	0.0615682	57.9687
Hist1h2an	ENSMUSG00000069309.2	UP	0.81243	0.00356309	0.048768	79.8485
Rangap1	ENSMUSG00000022391.15	UP	0.812243	3.74758e-05	0.00215812	200.46
Hectd2	ENSMUSG00000041180.13	UP	0.80764	0.00136221	0.026342	331.589
Kif4	ENSMUSG00000034311.3	UP	0.805535	0.0019367	0.0330579	44.038
Stip1	ENSMUSG00000024966.8	UP	0.80245	2.72133e-06	0.000307701	634.331
Gm12346	ENSMUSG00000083899.2	UP	0.801915	3.09939e-05	0.00189074	595.884
Tcf21	ENSMUSG00000045680.8	UP	0.798903	0.00889931	0.0869727	31.1668
Lgals3bp	ENSMUSG00000033880.11	UP	0.79443	2.61747e-05	0.00165948	147.905
Dnaja1	ENSMUSG00000028410.13	UP	0.791872	4.62088e-06	0.000450714	938.688
Gm8326	ENSMUSG00000101262.1	UP	0.791264	0.0110224	0.0980312	56.177
D630002J18Rik	ENSMUSG00000097293.1	UP	0.790296	0.00962602	0.0916253	32.4932
Ier5	ENSMUSG00000056708.5	UP	0.789258	2.81817e-07	5.62114e-05	358.586
Fam198b	ENSMUSG00000027955.16	UP	0.789019	1.03665e-07	2.61489e-05	4405.51
Gm36569	ENSMUSG00000102191.1	UP	0.788481	1.01867e-07	2.61489e-05	779.649
Il17b	ENSMUSG00000024578.2	UP	0.782418	0.00180944	0.0317402	38.2961
Siah2	ENSMUSG00000036432.8	UP	0.780682	4.87191e-05	0.00263677	124.198
Dach1	ENSMUSG00000055639.16	UP	0.780172	0.000613285	0.0157783	54.5027
H2-K1	ENSMUSG00000061232.15	UP	0.779455	0.000176712	0.00668868	755.626
Csrp2	ENSMUSG00000020186.7	UP	0.779349	3.70233e-08	1.31256e-05	9214.54
Erlin1	ENSMUSG00000025198.16	UP	0.77592	0.000108204	0.00473111	96.6683
Gm43439	ENSMUSG00000106407.1	UP	0.775085	1.74828e-05	0.00118005	117.206
Dynll1	ENSMUSG00000009013.5	UP	0.773437	1.07423e-06	0.000151347	2254.83
Fosl2	ENSMUSG00000029135.10	UP	0.773125	0.000172778	0.00661026	1352.33
Smc2	ENSMUSG00000028312.19	UP	0.771058	5.46223e-05	0.00285082	117.052
Fgf1	ENSMUSG00000036585.15	UP	0.768897	1.1982e-08	5.90844e-06	232.232
Hist1h2bm	ENSMUSG00000114279.1	UP	0.767734	0.00694878	0.0745187	74.9938
Gm10184	ENSMUSG00000066878.4	UP	0.766356	2.63463e-06	0.000303701	143.033
Gm4070	ENSMUSG00000078606.8	UP	0.765735	0.000496433	0.0137483	530.427
Oasl2	ENSMUSG00000029561.17	UP	0.764165	0.00377383	0.0502574	45.9066
Gm19658	ENSMUSG00000105256.1	UP	0.763718	0.00862358	0.0855203	49.3906
Fxyd5	ENSMUSG00000009687.14	UP	0.762293	2.80225e-05	0.0017516	188.358
Nsdhl	ENSMUSG00000031349.4	UP	0.76202	0.000509786	0.0139872	108.532
Exosc6	ENSMUSG00000109941.1	UP	0.761788	0.00579752	0.0663984	48.4506
Cdc42ep3	ENSMUSG00000036533.8	UP	0.761109	1.40409e-05	0.00100102	643.691
Mpzl3	ENSMUSG00000070305.10	UP	0.760846	0.00888629	0.0869142	27.3726
Gm4353	ENSMUSG00000091900.2	UP	0.759437	0.00442586	0.0554076	54.2206
Trnp1	ENSMUSG00000056596.8	UP	0.75903	0.000990578	0.0215944	54.5154
Tmem39b	ENSMUSG00000053730.15	UP	0.757638	0.00720181	0.075947	31.2063
Gvin1	ENSMUSG00000045868.12	UP	0.757188	0.000589898	0.0154225	534.945
Mob3a	ENSMUSG00000003348.10	UP	0.756881	1.61281e-05	0.00110972	472.676
Plod2	ENSMUSG00000032374.14	UP	0.756598	3.12436e-10	4.42827e-07	1709.29
Amotl2	ENSMUSG00000032531.15	UP	0.756554	0.000150923	0.00599369	696.289
Gm6788	ENSMUSG00000090737.1	UP	0.756397	1.60488e-06	0.000206448	267.11
Klf6	ENSMUSG00000000078.7	UP	0.755506	1.47897e-05	0.00104185	2823.38
Mcm6	ENSMUSG00000026355.11	UP	0.755303	0.00341539	0.0475998	107.662
Tnfrsf10b	ENSMUSG00000022074.6	UP	0.75108	0.00155637	0.0289685	84.1397
Colec11	ENSMUSG00000036655.8	UP	0.750585	0.00259912	0.0405444	48.5188
Zfp109	ENSMUSG00000074283.5	UP	0.750508	0.00376684	0.0502019	41.9481
H2-Q4	ENSMUSG00000035929.11	UP	0.749795	0.00191199	0.0327306	113.074
Pde7a	ENSMUSG00000069094.12	UP	0.74718	7.7161e-05	0.00364551	302.941
Hsp90aa1	ENSMUSG00000021270.13	UP	0.746632	2.66225e-05	0.0016759	2583.32
Sqle	ENSMUSG00000022351.14	UP	0.746162	0.00417633	0.0534136	291.508
Mtfr1	ENSMUSG00000027601.13	UP	0.746	6.50437e-07	0.000107912	498.884
Nusap1	ENSMUSG00000027306.15	UP	0.744218	0.00108583	0.0229199	50.7062
CT009754.1	ENSMUSG00000113030.1	UP	0.741147	0.00031485	0.0101438	96.6853
Tubb2a	ENSMUSG00000058672.7	UP	0.739548	8.3621e-06	0.00068993	654.371
Gm5763	ENSMUSG00000048600.7	UP	0.738148	0.000361427	0.0110431	189.762
Dnaja4	ENSMUSG00000032285.15	UP	0.737657	4.73262e-05	0.0025771	167.627
Spire1	ENSMUSG00000024533.16	UP	0.736183	0.000288328	0.00944355	355.832
Ier3	ENSMUSG00000003541.6	UP	0.735997	0.000951475	0.0210343	209.624
Gja1	ENSMUSG00000050953.10	UP	0.735651	6.14927e-06	0.000559622	1017.12
C1galt1	ENSMUSG00000042460.5	UP	0.734862	9.30776e-07	0.000135436	1037.45
Arl4c	ENSMUSG00000049866.12	UP	0.734197	7.37886e-05	0.00354026	97.8238
Wisp2	ENSMUSG00000027656.7	UP	0.730132	0.000184671	0.00678008	556.498
Cnnm4	ENSMUSG00000037408.10	UP	0.728158	0.000160622	0.006253	157.523
Gm26541	ENSMUSG00000097889.1	UP	0.724696	2.52159e-05	0.00161019	353.67
B3galnt2	ENSMUSG00000039242.10	UP	0.723602	1.17475e-06	0.000162923	1404.29
Jpt2	ENSMUSG00000024165.8	UP	0.722045	7.19416e-05	0.0034704	260.16
Tmem39a	ENSMUSG00000002845.14	UP	0.718852	8.20217e-06	0.000680397	452.22
Gm17315	ENSMUSG00000097791.1	UP	0.718767	0.000658124	0.0165472	81.0046
Cry1	ENSMUSG00000020038.10	UP	0.718651	0.000158188	0.00617176	283.847
Meox2	ENSMUSG00000036144.6	UP	0.717423	9.23667e-05	0.00421515	83.6086
Tex30	ENSMUSG00000026049.11	UP	0.715713	0.00504924	0.0603834	49.9492
P2ry2	ENSMUSG00000032860.5	UP	0.715505	6.34944e-05	0.00319307	162.052
Adm	ENSMUSG00000030790.15	UP	0.711558	8.51636e-05	0.00393704	114.546
Tubb2b	ENSMUSG00000045136.6	UP	0.708992	3.27492e-06	0.000347801	251.81
Hist1h2ah	ENSMUSG00000069302.5	UP	0.706419	0.00883728	0.0866737	136.489
Fhl2	ENSMUSG00000008136.14	UP	0.705272	8.44443e-07	0.000129229	194.914
Bag2	ENSMUSG00000042215.8	UP	0.703112	0.000184149	0.00678008	199.814
Tmem200b	ENSMUSG00000070720.3	UP	0.702762	0.000149883	0.00597914	159.301
Gm13889	ENSMUSG00000087006.3	UP	0.702163	2.53234e-07	5.22722e-05	183.094
Gm45515	ENSMUSG00000109799.1	UP	0.700851	0.00056475	0.0150306	78.3367
Cdr2	ENSMUSG00000030878.11	UP	0.696278	8.04491e-05	0.00377813	1459.09
9130208D14Rik	ENSMUSG00000086513.3	UP	0.695716	0.0112387	0.0991534	63.2918
Clec11a	ENSMUSG00000004473.10	UP	0.694221	1.02855e-05	0.000778343	628.701
Rasl11b	ENSMUSG00000049907.8	UP	0.693678	0.00461812	0.0571527	247.439
Pcgf5	ENSMUSG00000024805.16	UP	0.692992	9.82008e-05	0.00442452	692.494
S100a6	ENSMUSG00000001025.8	UP	0.690411	0.000498133	0.0137525	1331.41
Olfr328	ENSMUSG00000057654.6	UP	0.689832	0.00355062	0.0486722	76.6183
Arap2	ENSMUSG00000037999.13	UP	0.689303	2.23812e-07	4.67425e-05	598.196
Mmd	ENSMUSG00000003948.17	UP	0.688137	0.000320563	0.0103091	404.956
Gm8464	ENSMUSG00000087569.1	UP	0.688127	0.00173838	0.0312599	57.4217
Galnt6	ENSMUSG00000037280.12	UP	0.688067	5.00158e-05	0.00267475	636.559
Lyst	ENSMUSG00000019726.11	UP	0.688027	0.000676488	0.0167958	1791.91
Mkks	ENSMUSG00000027274.16	UP	0.686028	7.94159e-06	0.000664996	182.252
Etv5	ENSMUSG00000013089.15	UP	0.685179	0.00860032	0.0854353	72.0498
Med11	ENSMUSG00000018923.13	UP	0.679963	0.00100249	0.0216635	76.1659
AC151967.1	ENSMUSG00000106561.1	UP	0.679751	0.00426072	0.054142	76.1151
Myl4	ENSMUSG00000061086.12	UP	0.679215	0.0037073	0.0497888	85.5615
Dcun1d2	ENSMUSG00000038506.13	UP	0.677794	5.67052e-07	9.86892e-05	200.912
Fam241a	ENSMUSG00000050549.8	UP	0.677729	0.000467647	0.0132192	96.6285
Mcam	ENSMUSG00000032135.15	UP	0.6764	0.000248109	0.00856895	5557.98
Bmp4	ENSMUSG00000021835.15	UP	0.674508	0.000178414	0.0067102	348.65
Ppp1r3b	ENSMUSG00000046794.9	UP	0.673451	0.00111439	0.0232737	361.332
9930111J21Rik2	ENSMUSG00000069892.9	UP	0.673112	0.000207228	0.00746437	381.601
Slc9a2	ENSMUSG00000026062.12	UP	0.672994	0.0017947	0.031638	53.2549
Hsd17b12	ENSMUSG00000027195.10	UP	0.672403	0.000682466	0.01685	434.875
Tra2a	ENSMUSG00000029817.11	UP	0.670859	4.25174e-05	0.00238097	356.688
2010111I01Rik	ENSMUSG00000021458.17	UP	0.670796	4.2876e-05	0.00239351	2682.49
Gm14862	ENSMUSG00000079694.2	UP	0.670536	0.00118533	0.0243074	72.6531
Fas	ENSMUSG00000024778.12	UP	0.669705	8.66518e-06	0.000699202	429.8
Ppa1	ENSMUSG00000020089.8	UP	0.660637	0.0013664	0.0263916	239.619
Stk38l	ENSMUSG00000001630.13	UP	0.659937	3.36962e-05	0.00201405	1809.94
Hdac9	ENSMUSG00000004698.10	UP	0.65827	0.00017626	0.00668581	597.074
Yrdc	ENSMUSG00000028889.17	UP	0.656884	4.68436e-05	0.00255867	170.785
Sdc4	ENSMUSG00000017009.3	UP	0.656815	3.89612e-06	0.00039628	1857.19
Irf7	ENSMUSG00000025498.15	UP	0.656213	0.00524362	0.0617682	42.8969
Tmem204	ENSMUSG00000024168.7	UP	0.656094	0.00165405	0.0301775	156.113
Oat	ENSMUSG00000030934.9	UP	0.655402	5.13803e-06	0.000482594	5280.35
Fjx1	ENSMUSG00000075012.4	UP	0.651594	7.59544e-07	0.000119839	433.927
4930524O07Rik	ENSMUSG00000090207.2	UP	0.650282	0.00617234	0.0689561	91.0279
Gipc2	ENSMUSG00000039131.15	UP	0.648849	0.00869189	0.0859601	100.243
Gm10254	ENSMUSG00000069011.5	UP	0.647827	3.75654e-05	0.00215812	150.133
Fam111a	ENSMUSG00000024691.13	UP	0.64765	0.00373553	0.0500076	90.303
Pdlim5	ENSMUSG00000028273.15	UP	0.644283	0.00017559	0.00668581	5516.18
Ube2f	ENSMUSG00000034343.14	UP	0.64418	0.000447273	0.0128508	382.957
Rsad2	ENSMUSG00000020641.16	UP	0.643266	0.00700161	0.0749654	103.865
Rrp15	ENSMUSG00000001305.5	UP	0.64238	0.00802747	0.0818516	63.2016
Gm7809	ENSMUSG00000099397.1	UP	0.641458	0.00276077	0.0421403	62.1703
Ifit3	ENSMUSG00000074896.3	UP	0.641357	0.00172395	0.0311012	57.094
Hba-a2	ENSMUSG00000069917.7	UP	0.640725	0.00468291	0.0576098	60824.5
Pla2g4a	ENSMUSG00000056220.14	UP	0.638681	0.000797096	0.0186676	599.291
Htr1b	ENSMUSG00000049511.5	UP	0.636134	0.00181989	0.0318293	887.912
Stc1	ENSMUSG00000014813.9	UP	0.635463	0.0102738	0.0944956	213.295
Cilp2	ENSMUSG00000044006.8	UP	0.634898	0.000492826	0.0136912	225.25
Anxa3	ENSMUSG00000029484.12	UP	0.632638	0.000152442	0.00602705	1154.48
Gm10259	ENSMUSG00000069083.4	UP	0.632377	0.000326069	0.0104331	106.706
Fbxo33	ENSMUSG00000035329.7	UP	0.63147	0.000132583	0.00541864	256.644
Plekho1	ENSMUSG00000015745.9	UP	0.631245	5.00236e-05	0.00267475	665.79
Taf1a	ENSMUSG00000072258.10	UP	0.631022	0.00144157	0.0273879	80.1416
Pfdn4	ENSMUSG00000052033.13	UP	0.630634	0.000418258	0.0122523	86.2824
Hist1h2ao	ENSMUSG00000094248.1	UP	0.629195	0.0097118	0.0917148	103.51
Malt1	ENSMUSG00000032688.8	UP	0.629178	0.00144994	0.0274496	351.623
Tagln2	ENSMUSG00000026547.15	UP	0.629155	7.35467e-07	0.000118691	1935.04
Gm16907	ENSMUSG00000097242.1	UP	0.628477	0.00222671	0.0361582	484.632
E330011M16Rik	ENSMUSG00000103030.1	UP	0.628408	0.00617138	0.0689561	72.9041
Grwd1	ENSMUSG00000053801.18	UP	0.628125	0.00430857	0.0545547	77.1718
Ccna2	ENSMUSG00000027715.9	UP	0.627963	0.00476385	0.0583629	134.746
Fzd8	ENSMUSG00000036904.5	UP	0.627669	0.000387314	0.0115946	258.352
Rnf24	ENSMUSG00000048911.15	UP	0.622887	1.63493e-05	0.00111616	371.401
Mphosph10	ENSMUSG00000030521.11	UP	0.621217	0.00522083	0.0615815	101.294
Pak3	ENSMUSG00000031284.16	UP	0.619643	0.00131578	0.0258667	97.2015
Manf	ENSMUSG00000032575.16	UP	0.61917	0.000235503	0.00821346	573.088
Armc6	ENSMUSG00000002343.11	UP	0.6164	0.00127906	0.025455	96.7285
Hba-a1	ENSMUSG00000069919.7	UP	0.616278	0.00672463	0.0733044	64414.3
Lats2.1	ENSMUSG00000021959.16	UP	0.616086	0.000637384	0.0162057	1432.23
Hsp25-ps1	ENSMUSG00000078915.2	UP	0.615435	0.00620798	0.06919	421.587
Snrpf	ENSMUSG00000020018.6	UP	0.614382	0.000762406	0.018098	80.1096
Hist1h2ap	ENSMUSG00000094777.2	UP	0.613937	0.00835461	0.0838863	107.808
Slc35a2	ENSMUSG00000031156.18	UP	0.61379	5.92746e-05	0.00302369	188.589
Spry1	ENSMUSG00000037211.12	UP	0.612471	5.58449e-06	0.000516333	320.375
Tmem62	ENSMUSG00000054484.14	UP	0.612201	0.00175981	0.0312899	87.4075
AL731706.1	ENSMUSG00000115423.1	UP	0.611542	0.000459365	0.0130683	106.687
Fam96b	ENSMUSG00000031879.14	UP	0.611264	0.000297065	0.00964076	178.693
Kti12	ENSMUSG00000073775.4	UP	0.611176	0.00403268	0.052561	71.0183
Gm17103	ENSMUSG00000091238.1	UP	0.610941	0.00789363	0.0808118	62.0827
Hmgcs1	ENSMUSG00000093930.2	UP	0.609731	0.00103619	0.022162	559.303
Folr2	ENSMUSG00000032725.10	UP	0.609076	0.00196968	0.0334601	119.976
Mmrn1	ENSMUSG00000054641.10	UP	0.607787	0.000831312	0.0192908	104.872
Serpini1	ENSMUSG00000027834.15	UP	0.607538	0.000604626	0.0156697	679.506
Uchl1	ENSMUSG00000029223.12	UP	0.607182	1.11839e-06	0.000156328	575.255
Tubb4b-ps1	ENSMUSG00000095159.2	UP	0.605668	0.000567149	0.0150719	270.819
Zfp367	ENSMUSG00000044934.13	UP	0.604959	0.000129791	0.00532112	305.099
Cgref1	ENSMUSG00000029161.7	UP	0.60439	0.00469341	0.0576591	141.127
Enpep	ENSMUSG00000028024.14	UP	0.603273	0.000271509	0.00906376	213.417
Fgf2	ENSMUSG00000037225.13	UP	0.603081	0.000194788	0.00710037	1622.09
Gm26586	ENSMUSG00000097472.1	UP	0.599874	2.48519e-06	0.000292167	534.13
Pdgfa	ENSMUSG00000025856.15	UP	0.59854	0.000346212	0.0107877	526.35
Mis12	ENSMUSG00000040599.13	UP	0.598163	0.00730139	0.0764686	109.262
Mettl16	ENSMUSG00000010554.14	UP	0.597922	0.000103873	0.00457556	137.642
Rdh11	ENSMUSG00000066441.14	UP	0.596806	1.26286e-05	0.000918781	288.397
Tmem202	ENSMUSG00000049526.8	UP	0.592954	0.000727729	0.0175764	86.7641
Nup35	ENSMUSG00000026999.14	UP	0.592384	0.00296297	0.0442378	130.811
Dnajb2	ENSMUSG00000026203.16	UP	0.59212	0.00182334	0.0318582	188.77
Gm336	ENSMUSG00000101439.1	UP	0.591465	0.00983453	0.0924429	50.3331
Sertad1	ENSMUSG00000008384.8	UP	0.591419	0.0109785	0.0978458	287.259
Eif1a	ENSMUSG00000057561.9	UP	0.591066	5.57304e-05	0.00287595	446.455
Nfya	ENSMUSG00000023994.13	UP	0.588882	3.19753e-05	0.0019307	272.859
Ccdc38	ENSMUSG00000036168.15	UP	0.586799	0.00461746	0.0571527	60.8401
Hist1h3c	ENSMUSG00000069310.4	UP	0.585389	0.00968952	0.0917148	229.903
Hist1h3a	ENSMUSG00000069265.2	UP	0.585189	0.0109668	0.0978383	208.428
Gskip	ENSMUSG00000044715.7	UP	0.584483	9.65914e-05	0.00436308	167.578
Thap1	ENSMUSG00000037214.12	UP	0.583735	0.00328892	0.0470087	64.034
Rnf11	ENSMUSG00000028557.10	UP	0.583503	2.69172e-06	0.000306304	1921.06
Tlr4	ENSMUSG00000039005.13	UP	0.583446	9.22116e-07	0.000135284	1140.88
Gm6361	ENSMUSG00000068964.5	UP	0.58336	0.0087528	0.0861763	73.2091
Mlx	ENSMUSG00000017801.15	UP	0.583142	0.000842172	0.0193338	193.308
Uchl1os	ENSMUSG00000087601.3	UP	0.581925	0.00863296	0.0855203	56.7014
Enah	ENSMUSG00000022995.16	UP	0.581108	0.00203377	0.0341889	2713.36
Nfic	ENSMUSG00000055053.18	down	-0.580218	0.00214655	0.0353484	1018.94
4931406C07Rik	ENSMUSG00000031938.15	down	-0.58038	0.00168206	0.0306012	143.511
Slc29a3	ENSMUSG00000020100.15	down	-0.580728	0.00226663	0.0364798	215.13
Ubald1	ENSMUSG00000039568.6	down	-0.582921	0.00134582	0.0261432	128.8
Gm42992	ENSMUSG00000106320.1	down	-0.583733	0.00752466	0.0779334	74.8291
Zfp628	ENSMUSG00000074406.5	down	-0.583926	0.00371783	0.0498481	87.066
Nrde2	ENSMUSG00000021179.8	down	-0.584526	0.00176219	0.0312899	166.578
Gm44667	ENSMUSG00000109539.1	down	-0.585242	0.0094061	0.0902091	73.6615
Wdr60	ENSMUSG00000042050.8	down	-0.585639	0.00480791	0.0585613	73.9295
Hilpda	ENSMUSG00000043421.8	down	-0.585838	0.00322989	0.0466155	99.0364
Atn1	ENSMUSG00000004263.15	down	-0.586836	0.00327388	0.0468645	256.253
Notch1	ENSMUSG00000026923.15	down	-0.587235	7.94325e-05	0.00374028	614.626
Pcgf2	ENSMUSG00000018537.16	down	-0.587488	0.000769251	0.0181834	104.424
Bub1b	ENSMUSG00000040084.9	down	-0.587562	0.00453633	0.056404	69.6483
Adgrg1	ENSMUSG00000031785.16	down	-0.587854	0.00513847	0.0608932	79.8653
Zranb3	ENSMUSG00000036086.16	down	-0.590418	0.00199887	0.0338661	71.9048
Nlrx1	ENSMUSG00000032109.15	down	-0.591275	0.0107286	0.096561	169.597
Slc7a5	ENSMUSG00000040010.10	down	-0.591538	0.000478306	0.0134349	215.776
Cep250	ENSMUSG00000038241.16	down	-0.591766	0.000581747	0.0153184	144.32
Igf2bp3	ENSMUSG00000029814.10	down	-0.592512	0.0111061	0.0985283	81.9843
St5	ENSMUSG00000031024.13	down	-0.594212	0.00233452	0.0373355	1404.62
Nudt16	ENSMUSG00000032565.9	down	-0.595098	0.00743128	0.0773724	96.7836
Mical3	ENSMUSG00000051586.16	down	-0.595179	0.000177538	0.00670565	1038.45
Cdc42bpg	ENSMUSG00000024769.7	down	-0.595511	0.00747103	0.0776952	64.6345
Dcxr	ENSMUSG00000039450.11	down	-0.597636	0.00357579	0.0488664	88.8499
1700019D03Rik	ENSMUSG00000043629.12	down	-0.600074	0.00147257	0.0278392	82.8481
Lpin1	ENSMUSG00000020593.15	down	-0.601133	0.000885519	0.0200855	546.066
Cbx4	ENSMUSG00000039989.7	down	-0.601807	0.00179017	0.031621	127.451
Atp1b2	ENSMUSG00000041329.13	down	-0.60203	0.000727142	0.0175764	285.61
Gm45837	ENSMUSG00000030653.17	down	-0.602911	0.000121343	0.00510045	120.309
Vwc2	ENSMUSG00000050830.17	down	-0.606193	6.17879e-06	0.000559622	182.246
Rhobtb1	ENSMUSG00000019944.14	down	-0.607062	0.000127712	0.00524802	615.147
Gramd1b	ENSMUSG00000040111.16	down	-0.607684	0.00286845	0.0433368	143.72
Fndc5	ENSMUSG00000001334.9	down	-0.60869	0.0059442	0.067254	90.0597
mt-Nd5	ENSMUSG00000064367.1	down	-0.610225	0.00336203	0.0473949	2763.35
Pdk2	ENSMUSG00000038967.13	down	-0.610487	0.000515981	0.0140918	231.676
Tst	ENSMUSG00000044986.8	down	-0.612068	0.00151948	0.0284834	91.2696
Herc3	ENSMUSG00000029804.16	down	-0.613082	3.28671e-05	0.00197114	296.725
Zfp39	ENSMUSG00000037001.10	down	-0.613188	4.10839e-05	0.00232268	170.019
Arrdc4	ENSMUSG00000042659.15	down	-0.613427	0.000608099	0.0156928	138.139
Fam214a	ENSMUSG00000034858.16	down	-0.616118	3.15057e-05	0.00191537	283.781
AI838599	ENSMUSG00000085180.1	down	-0.616955	0.00336985	0.0473949	281.935
Rab3a	ENSMUSG00000031840.12	down	-0.617562	0.00135563	0.0263007	125.159
Dapk1	ENSMUSG00000021559.14	down	-0.618745	0.000662176	0.0165578	388.083
Slc24a4	ENSMUSG00000041771.13	down	-0.619636	2.25347e-06	0.000268109	234.391
Ssc5d	ENSMUSG00000035279.8	down	-0.620574	0.010194	0.0941159	162.404
Ssh2	ENSMUSG00000037926.15	down	-0.621746	5.50507e-07	9.67585e-05	709.125
Vwf	ENSMUSG00000001930.17	down	-0.623007	1.01589e-07	2.61489e-05	3032.11
Gm15774	ENSMUSG00000085118.2	down	-0.623694	0.00121574	0.0245248	73.3285
Acvr1c	ENSMUSG00000026834.13	down	-0.624235	0.00122016	0.0245581	102.181
Gm29100	ENSMUSG00000100980.1	down	-0.624898	0.000921642	0.0206058	69.3421
2810474O19Rik	ENSMUSG00000032712.16	down	-0.627076	2.53284e-06	0.000295809	1167.11
Sema4c	ENSMUSG00000026121.13	down	-0.627576	0.000124533	0.00515589	139.699
Gli2	ENSMUSG00000048402.14	down	-0.628998	0.00520332	0.0614567	148.367
Lmbr1l	ENSMUSG00000022999.14	down	-0.629846	1.35332e-05	0.000976593	133.721
Gm43422	ENSMUSG00000106643.1	down	-0.634548	8.50741e-05	0.00393704	122.505
Tmem120a	ENSMUSG00000039886.8	down	-0.635047	0.0034015	0.0475751	192.856
Gm16559	ENSMUSG00000089635.1	down	-0.638099	0.000340456	0.010678	117.627
Snn	ENSMUSG00000037972.6	down	-0.638333	0.00324943	0.0467755	167.471
Polr2a	ENSMUSG00000005198.15	down	-0.639773	0.000583082	0.0153184	566.673
Sema4b	ENSMUSG00000030539.13	down	-0.640062	0.0058059	0.0664515	86.7482
Gm12966	ENSMUSG00000070729.5	down	-0.640629	0.00267275	0.041254	96.5115
Tns2	ENSMUSG00000037003.15	down	-0.642924	4.14621e-08	1.38874e-05	1225.11
Gm20342	ENSMUSG00000101599.1	down	-0.643439	0.00238321	0.0378414	80.4816
Gm29361	ENSMUSG00000099708.1	down	-0.645271	0.00859578	0.0854353	42.2976
Rasgrf2	ENSMUSG00000021708.17	down	-0.645289	0.00650975	0.0716957	166.995
Baiap2	ENSMUSG00000025372.16	down	-0.64623	0.000213418	0.00759239	122.28
Adra1a	ENSMUSG00000045875.13	down	-0.646239	0.00805319	0.0819726	74.0531
Teddm2	ENSMUSG00000045968.7	down	-0.650864	0.00647119	0.0714851	353.606
Xrcc3	ENSMUSG00000021287.12	down	-0.651282	0.00991217	0.0928787	49.6866
Fmo5	ENSMUSG00000028088.14	down	-0.651314	0.00822451	0.0831029	124.997
Hoxaas2	ENSMUSG00000056445.8	down	-0.651914	0.00100132	0.0216635	71.0309
Adh7	ENSMUSG00000055301.8	down	-0.652313	0.00369305	0.049773	57.0615
Gm26508	ENSMUSG00000097614.1	down	-0.652425	0.00938521	0.0901062	45.3916
Clec3b	ENSMUSG00000025784.5	down	-0.653962	0.00118853	0.0243074	195.066
Ralgds	ENSMUSG00000026821.15	down	-0.654602	0.000500815	0.0137837	175.491
Eef2k	ENSMUSG00000035064.17	down	-0.65549	3.19947e-06	0.000344225	1026.05
Setd1b	ENSMUSG00000038384.16	down	-0.655977	0.000118696	0.00506511	201.343
mt-Tl1	ENSMUSG00000064340.1	down	-0.659578	0.00651044	0.0716957	291.088
Ppif	ENSMUSG00000021868.7	down	-0.660036	0.00127067	0.0253448	70.0469
Bcl7a	ENSMUSG00000029438.9	down	-0.662436	3.83225e-06	0.000395524	182.115
Gkn3	ENSMUSG00000030048.5	down	-0.663457	0.00293416	0.0438814	89.5942
Celsr2	ENSMUSG00000068740.13	down	-0.663532	0.00267482	0.041254	174.287
Cbfa2t3	ENSMUSG00000006362.16	down	-0.665385	6.14273e-06	0.000559622	163.08
Mknk2	ENSMUSG00000020190.13	down	-0.668112	4.2887e-07	8.09925e-05	820.455
Gm11266	ENSMUSG00000087413.1	down	-0.669663	0.00706259	0.0753909	47.5597
Nos1ap	ENSMUSG00000038473.14	down	-0.67025	0.000345511	0.0107877	112.243
Gm45053	ENSMUSG00000108368.1	down	-0.670319	0.00991867	0.0928787	37.7871
Tob1	ENSMUSG00000037573.5	down	-0.671441	0.000291062	0.00948049	186.874
Mamld1	ENSMUSG00000059401.13	down	-0.671521	0.00709517	0.0756023	185.98
Rara	ENSMUSG00000037992.16	down	-0.673116	3.71738e-05	0.00214954	182.318
Klf10	ENSMUSG00000037465.10	down	-0.675375	0.00415106	0.0534136	502.616
5730596B20Rik	ENSMUSG00000056468.3	down	-0.677828	0.00282726	0.0429452	51.9011
Tcim	ENSMUSG00000056313.5	down	-0.6799	2.34336e-05	0.00151514	167.673
Gm43359	ENSMUSG00000105434.1	down	-0.680014	0.00399237	0.0522659	59.4884
Mnt	ENSMUSG00000000282.12	down	-0.682457	7.11409e-05	0.00346049	120.5
Gm42993	ENSMUSG00000105985.1	down	-0.682503	0.00313188	0.0458345	100.87
Gm13306	ENSMUSG00000073877.10	down	-0.683198	0.0107331	0.096561	62.048
Sema6c	ENSMUSG00000038777.19	down	-0.684221	0.000893896	0.0201889	103.654
Satb1	ENSMUSG00000023927.15	down	-0.68509	0.00840852	0.0842846	236.635
Mapk1ip1	ENSMUSG00000041775.7	down	-0.689247	0.00116358	0.0239974	119.443
Sesn1	ENSMUSG00000038332.13	down	-0.689892	9.52246e-06	0.000741416	1188.01
Tbkbp1	ENSMUSG00000038517.15	down	-0.690249	0.00274258	0.041971	49.2991
Zfp956	ENSMUSG00000045466.18	down	-0.692669	0.000673646	0.0167487	83.4413
Aldh5a1	ENSMUSG00000035936.6	down	-0.693741	0.00341608	0.0475998	62.0906
Gm2011	ENSMUSG00000107741.2	down	-0.693877	0.00907088	0.0878485	44.5867
Plag1	ENSMUSG00000003282.9	down	-0.694498	0.000554351	0.0148352	74.6322
Lsp1	ENSMUSG00000018819.10	down	-0.695254	6.34393e-06	0.000566986	495.511
Abcg1	ENSMUSG00000024030.6	down	-0.695359	0.00544507	0.0635927	44.5009
Strip2	ENSMUSG00000039629.14	down	-0.696131	0.00108253	0.0229047	72.9647
Gm20457	ENSMUSG00000092187.1	down	-0.697782	0.0062276	0.0693553	41.1108
Rtf1	ENSMUSG00000027304.9	down	-0.698597	0.000902844	0.0203425	123.539
Kcnk3	ENSMUSG00000049265.7	down	-0.698838	0.000180328	0.00675603	150.853
Gm4117	ENSMUSG00000089940.1	down	-0.701387	0.000180652	0.00675603	107.435
Ppp4r1l-ps	ENSMUSG00000055897.13	down	-0.703154	6.74446e-06	0.000596589	120.585
Cyp1b1	ENSMUSG00000024087.3	down	-0.703398	4.46045e-10	5.27879e-07	945.685
Cyp2d22	ENSMUSG00000061740.7	down	-0.706722	1.29799e-07	3.07227e-05	202.93
Abca1	ENSMUSG00000015243.4	down	-0.708953	1.23579e-05	0.000902787	1182.15
Bcl9l	ENSMUSG00000063382.6	down	-0.712317	3.32482e-06	0.000347801	559.477
Prdm11	ENSMUSG00000075028.11	down	-0.712618	1.22892e-07	2.94807e-05	296.746
AC154528.2	ENSMUSG00000115686.1	down	-0.716661	0.0109191	0.09765	40.1602
Gm27533	ENSMUSG00000098543.1	down	-0.716717	0.00553182	0.0641836	55.5074
Glul	ENSMUSG00000026473.15	down	-0.719461	0.000393127	0.0117094	4102.01
Zc3h6	ENSMUSG00000042851.17	down	-0.719902	0.00730048	0.0764686	122.516
1700017B05Rik	ENSMUSG00000032300.7	down	-0.72191	3.85687e-06	0.000395764	262.437
Camk4	ENSMUSG00000038128.6	down	-0.725422	0.00101345	0.021807	119.158
Pfkfb3	ENSMUSG00000026773.19	down	-0.726165	0.00027087	0.00906376	470.339
Gpihbp1	ENSMUSG00000022579.10	down	-0.727928	0.000936226	0.0207749	96.5576
Prr12	ENSMUSG00000046574.8	down	-0.730403	0.000659122	0.0165472	190.703
Klf13	ENSMUSG00000052040.10	down	-0.731103	1.43992e-07	3.27712e-05	2027.14
Cdkn1a	ENSMUSG00000023067.13	down	-0.732468	0.000348555	0.0108364	263.269
A4galt	ENSMUSG00000047878.12	down	-0.732605	5.46104e-05	0.00285082	457.893
Gli1	ENSMUSG00000025407.7	down	-0.732653	0.000222853	0.00784937	151.119
Gm27252	ENSMUSG00000098708.7	down	-0.734157	0.00273934	0.0419575	67.6864
Fam212b	ENSMUSG00000048458.8	down	-0.737154	3.61324e-05	0.00209615	132.595
Cd46	ENSMUSG00000016493.13	down	-0.739888	1.9506e-06	0.000240643	133.438
Gm36936	ENSMUSG00000102411.1	down	-0.741216	0.00662822	0.0726771	60.0301
5430403G16Rik	ENSMUSG00000072763.2	down	-0.742786	0.0104204	0.0950478	35.8299
Prag1	ENSMUSG00000050271.12	down	-0.75196	0.00702816	0.0750685	73.6723
2900089D17Rik	ENSMUSG00000087484.1	down	-0.752015	0.00119375	0.0243579	48.7967
Inf2	ENSMUSG00000037679.9	down	-0.761143	1.7747e-05	0.00119335	104.593
Gm20186	ENSMUSG00000106874.1	down	-0.763644	6.88011e-05	0.0034035	704.808
1810032O08Rik	ENSMUSG00000020812.17	down	-0.764705	0.00661856	0.0726609	33.3573
Bcdin3d	ENSMUSG00000037525.4	down	-0.76777	0.00400941	0.0523345	34.4607
Gm43915	ENSMUSG00000108171.1	down	-0.768194	0.00620886	0.06919	28.6359
Lgi1	ENSMUSG00000067242.11	down	-0.769502	0.00246546	0.0388162	36.4513
Nfkbia	ENSMUSG00000021025.8	down	-0.770772	0.00108572	0.0229199	739.303
Zmiz1	ENSMUSG00000007817.14	down	-0.772178	2.22073e-05	0.00146009	543.425
Rasd2	ENSMUSG00000034472.13	down	-0.774893	0.00343032	0.0477608	36.6484
Klhl41	ENSMUSG00000075307.3	down	-0.775008	0.000153552	0.00604402	87.7271
Slc25a27	ENSMUSG00000023912.9	down	-0.77579	0.00546515	0.0636596	34.3787
Fus	ENSMUSG00000030795.18	down	-0.778076	0.000102683	0.00456848	327.332
Abcc10	ENSMUSG00000032842.13	down	-0.781261	0.0106461	0.095999	62.2244
Epb41l4b	ENSMUSG00000028434.12	down	-0.781603	0.00114109	0.023692	73.7206
Pdss1	ENSMUSG00000026784.14	down	-0.785525	0.00025745	0.00874756	79.9327
Bicra	ENSMUSG00000070808.4	down	-0.789436	0.000513191	0.0140372	73.635
Ccdc60	ENSMUSG00000043913.14	down	-0.790515	0.000517251	0.0141048	52.2671
AC170188.1	ENSMUSG00000114282.1	down	-0.791408	0.00731731	0.0765901	44.9624
Gm43283	ENSMUSG00000106490.1	down	-0.791574	0.000512742	0.0140372	54.91
Ablim3	ENSMUSG00000032735.14	down	-0.791932	0.00137158	0.0263916	53.576
Gm43958	ENSMUSG00000108169.1	down	-0.797557	0.000257716	0.00874756	60.7784
Gm38034	ENSMUSG00000102844.1	down	-0.799013	0.0050575	0.0603834	31.2458
Cbs	ENSMUSG00000024039.14	down	-0.80059	0.01081	0.0969191	74.3506
Tango6	ENSMUSG00000041949.6	down	-0.801186	8.40977e-09	4.26543e-06	197.865
Tob2	ENSMUSG00000048546.7	down	-0.801207	7.56593e-05	0.00361049	1958.52
Polg2	ENSMUSG00000020718.12	down	-0.801957	0.00276736	0.0422047	56.3241
Gm13307	ENSMUSG00000085730.7	down	-0.803325	0.00151378	0.0284366	56.4474
Cebpb	ENSMUSG00000056501.3	down	-0.803799	5.00138e-05	0.00267475	442.743
Gpr146	ENSMUSG00000044197.8	down	-0.805185	0.000911924	0.0205177	170.197
Stbd1	ENSMUSG00000047963.7	down	-0.805646	3.58949e-08	1.31256e-05	871.738
Zfp385a	ENSMUSG00000000552.9	down	-0.811941	0.00221437	0.036137	63.8406
Rgs2	ENSMUSG00000026360.9	down	-0.814248	0.000265161	0.00894893	292.207
Hoxb5	ENSMUSG00000038700.4	down	-0.814797	0.00262859	0.0408248	32.9906
Gm6211	ENSMUSG00000091577.2	down	-0.815037	0.00672673	0.0733044	48.2263
Gm43953	ENSMUSG00000108067.1	down	-0.815925	0.0106078	0.0958155	42.6232
2810021J22Rik	ENSMUSG00000020491.15	down	-0.817516	0.000243866	0.00846286	56.7107
Ppargc1b	ENSMUSG00000033871.14	down	-0.820868	0.00634426	0.0703896	38.5513
Heyl	ENSMUSG00000032744.4	down	-0.822449	1.15665e-07	2.81271e-05	1227.84
Bcl9	ENSMUSG00000038256.15	down	-0.829731	6.80938e-06	0.000598416	128.373
Upf3b	ENSMUSG00000036572.16	down	-0.83043	0.00141007	0.0269738	45.6307
Lca5l	ENSMUSG00000045275.15	down	-0.832701	0.00426495	0.054157	34.0642
Tnfrsf21	ENSMUSG00000023915.4	down	-0.8366	0.001885	0.0325512	56.7426
Proser1	ENSMUSG00000049504.12	down	-0.839359	0.0029908	0.0443728	54.8381
Timp4	ENSMUSG00000030317.8	down	-0.84372	7.14154e-05	0.00346049	251.286
Gm37949	ENSMUSG00000103614.1	down	-0.848218	0.0027001	0.0414638	48.7611
Gm44386	ENSMUSG00000107689.1	down	-0.85038	0.00726884	0.0764434	32.7429
Zscan2	ENSMUSG00000038797.13	down	-0.851779	0.00988182	0.0927178	22.2092
Masp2	ENSMUSG00000028979.17	down	-0.851822	3.09145e-05	0.00189074	80.5991
AC160336.1	ENSMUSG00000115801.1	down	-0.851991	1.14305e-05	0.000849014	191.709
Gm26574	ENSMUSG00000097925.1	down	-0.856639	0.00156895	0.0290931	47.5665
4930444A19Rik	ENSMUSG00000101674.6	down	-0.857547	0.00405754	0.0527302	37.87
AC153524.1	ENSMUSG00000111892.1	down	-0.86021	0.00940485	0.0902091	24.0615
Prodh	ENSMUSG00000003526.11	down	-0.862822	0.00184506	0.0321743	67.492
Lrrc75b	ENSMUSG00000046807.10	down	-0.863858	7.48036e-05	0.00357928	82.2016
Cish	ENSMUSG00000032578.7	down	-0.86452	2.90623e-05	0.00179761	68.1919
Bbc3	ENSMUSG00000002083.13	down	-0.866509	0.00221786	0.036137	68.7346
Rnf125	ENSMUSG00000033107.5	down	-0.872094	0.0002741	0.00911204	81.5619
Foxo1	ENSMUSG00000044167.6	down	-0.872134	5.05539e-06	0.000479911	1030.73
Clec1a	ENSMUSG00000033082.10	down	-0.872239	7.64477e-05	0.00363834	71.4046
Gpr21	ENSMUSG00000053164.6	down	-0.872637	0.000363574	0.0110896	100.145
Irf2bpl	ENSMUSG00000034168.7	down	-0.874958	0.0096234	0.0916253	1076.07
Gm3883	ENSMUSG00000093909.2	down	-0.876439	0.000359367	0.0109991	98.4898
Fam205a4	ENSMUSG00000078746.2	down	-0.877107	0.000835401	0.0193338	51.734
Zbtb16	ENSMUSG00000066687.5	down	-0.877601	8.90387e-05	0.00407375	1256.05
Gm10686	ENSMUSG00000111685.1	down	-0.885455	0.0104246	0.0950478	40.2394
Gm26674	ENSMUSG00000097597.2	down	-0.88577	0.0101758	0.0940784	21.263
Dusp4	ENSMUSG00000031530.6	down	-0.888262	0.00232762	0.0372587	31.1717
Gm12592	ENSMUSG00000053263.3	down	-0.888301	0.00431702	0.0546227	64.5283
Zfp395	ENSMUSG00000034522.10	down	-0.890921	1.33375e-06	0.000180738	107.515
Glns-ps1	ENSMUSG00000082100.1	down	-0.893152	0.00144649	0.0274338	49.1409
Pde2a	ENSMUSG00000110195.1	down	-0.893873	8.9816e-06	0.000718204	70.4748
Kdm6b	ENSMUSG00000018476.7	down	-0.894353	5.11474e-06	0.000482594	329.015
Wnk4	ENSMUSG00000035112.17	down	-0.89547	0.00971053	0.0917148	35.2016
Jade2	ENSMUSG00000020387.15	down	-0.89628	4.10082e-06	0.000408976	166.111
Gm26632	ENSMUSG00000097442.1	down	-0.897277	0.0004415	0.0127439	54.1967
Ncor2	ENSMUSG00000029478.16	down	-0.903589	2.75519e-07	5.55796e-05	536.394
Tmem86a	ENSMUSG00000010307.7	down	-0.903884	0.00155802	0.0289685	194.143
Fign	ENSMUSG00000075324.13	down	-0.905145	0.00170691	0.0308889	42.167
Gm42572	ENSMUSG00000107171.1	down	-0.905531	0.010485	0.0954164	26.9941
Arhgap27	ENSMUSG00000034255.17	down	-0.906408	0.0112277	0.0991534	20.6139
Sema6b	ENSMUSG00000001227.11	down	-0.908941	0.00370426	0.0497888	26.4025
Shd	ENSMUSG00000039154.7	down	-0.91249	9.87239e-05	0.00442563	42.6424
ENSMUSG00000079774.2	ENSMUSG00000079774.2	down	-0.913126	0.000670132	0.0166847	49.6347
Efhc2	ENSMUSG00000025038.7	down	-0.913831	0.00297155	0.0442913	36.5037
Fam205a3	ENSMUSG00000093996.1	down	-0.914131	0.00105043	0.0224314	47.75
Igfbp3	ENSMUSG00000020427.11	down	-0.914836	3.53391e-05	0.00206362	456.917
Lmntd1	ENSMUSG00000054966.13	down	-0.9213	1.87016e-05	0.00124341	116.985
Gdap10	ENSMUSG00000096954.1	down	-0.924287	6.67947e-05	0.0033214	58.4176
Fam205a2	ENSMUSG00000094066.1	down	-0.925106	0.000739339	0.0177842	47.8326
Gm20402	ENSMUSG00000092405.1	down	-0.92652	0.000639963	0.0162295	123.359
1700023H06Rik	ENSMUSG00000089827.1	down	-0.92671	0.0036954	0.049773	61.3646
Acss3	ENSMUSG00000035948.13	down	-0.926751	0.000976219	0.0214004	68.4551
Gm38120	ENSMUSG00000103085.1	down	-0.929296	0.0106114	0.0958155	20.6293
Mn1	ENSMUSG00000070576.4	down	-0.931122	5.38077e-07	9.64843e-05	968.142
Rhou	ENSMUSG00000039960.5	down	-0.931705	4.74844e-06	0.000455645	432.352
Gm26978	ENSMUSG00000098166.1	down	-0.932823	0.00180145	0.0317255	29.96
9130214F15Rik	ENSMUSG00000109237.1	down	-0.933044	0.00404149	0.0526003	35.0396
Eva1c	ENSMUSG00000039903.16	down	-0.933543	1.94261e-09	1.56751e-06	183.368
Dhtkd1	ENSMUSG00000025815.13	down	-0.935754	0.0103222	0.0946493	27.0792
Etfbkmt	ENSMUSG00000039958.17	down	-0.936964	2.63058e-07	5.36758e-05	205.281
Prr33	ENSMUSG00000043795.9	down	-0.939243	0.000842737	0.0193338	40.2946
Rhbdd2	ENSMUSG00000039917.10	down	-0.940636	1.29801e-06	0.000178622	98.4537
Gucd1	ENSMUSG00000033416.15	down	-0.941363	4.59896e-06	0.000450714	659.461
Trp53inp1	ENSMUSG00000028211.11	down	-0.943236	7.19656e-07	0.000117205	4642.4
Cd300lg	ENSMUSG00000017309.11	down	-0.944123	7.12001e-05	0.00346049	58.4316
Gm37530	ENSMUSG00000103694.1	down	-0.946907	3.23311e-06	0.000345748	137.396
Gm29237	ENSMUSG00000101872.1	down	-0.947216	0.000680736	0.01685	34.3459
Trpm3	ENSMUSG00000052387.15	down	-0.948336	0.000268113	0.0090192	40.5089
Spock3	ENSMUSG00000054162.15	down	-0.954266	0.00361517	0.0490961	30.9707
Zfp503	ENSMUSG00000039081.10	down	-0.958753	1.80704e-05	0.00121051	102.371
Fbxo31	ENSMUSG00000052934.14	down	-0.959323	1.00741e-05	0.000778343	429.031
Vamp1	ENSMUSG00000030337.16	down	-0.962003	0.000470228	0.0132711	53.9004
Gm43672	ENSMUSG00000106019.1	down	-0.963541	0.000680152	0.01685	61.0708
Gsdme	ENSMUSG00000029821.15	down	-0.9641	5.61896e-06	0.000516828	298.309
AC124392.1	ENSMUSG00000114433.1	down	-0.964407	1.55372e-05	0.00107741	344.141
CT009696.3	ENSMUSG00000111593.1	down	-0.964695	0.00152686	0.0285915	34.7672
Wnt11	ENSMUSG00000015957.12	down	-0.965013	0.00293173	0.0438814	33.775
Trim67	ENSMUSG00000036913.15	down	-0.966187	5.86116e-07	0.000100055	96.346
Vwa3a	ENSMUSG00000030889.14	down	-0.966262	0.000758201	0.0180908	39.215
Gm21955	ENSMUSG00000102504.1	down	-0.967914	2.68814e-09	1.98833e-06	214.276
Il20rb	ENSMUSG00000044244.18	down	-0.972716	0.00404162	0.0526003	29.864
Engase	ENSMUSG00000033857.12	down	-0.973389	2.94239e-06	0.000324431	154.815
2610307P16Rik	ENSMUSG00000085936.7	down	-0.974994	2.42602e-05	0.00156039	45.1095
Pim3	ENSMUSG00000035828.10	down	-0.975508	7.21372e-05	0.00347041	211.514
Mthfd2	ENSMUSG00000005667.8	down	-0.97612	5.24298e-07	9.49729e-05	467.749
9530086O07Rik	ENSMUSG00000108076.1	down	-0.978531	0.000144578	0.00581984	51.8575
Adra1b	ENSMUSG00000050541.14	down	-0.978777	0.002309	0.0369941	22.4471
Slc25a34	ENSMUSG00000040740.7	down	-0.979709	0.00798996	0.0816097	538.365
AI507597	ENSMUSG00000073731.12	down	-0.981302	0.000349902	0.0108413	70.5432
AC013548.1	ENSMUSG00000115302.1	down	-0.986793	0.000103552	0.00457556	291.425
Gdf7	ENSMUSG00000037660.5	down	-0.986912	0.0101805	0.0940784	22.2707
Igf2	ENSMUSG00000048583.16	down	-0.987972	0.000115739	0.00497482	294.421
Zmiz1os1	ENSMUSG00000087535.2	down	-0.990956	0.00415987	0.0534136	31.8536
4933423P22Rik	ENSMUSG00000085471.1	down	-0.992633	0.000681599	0.01685	48.6901
Neat1	ENSMUSG00000092274.2	down	-0.99296	1.35333e-09	1.14401e-06	1554.6
Bcl2l11	ENSMUSG00000027381.16	down	-1.00228	0.00314401	0.0458631	47.0907
Gm44901	ENSMUSG00000108954.1	down	-1.00291	0.00680695	0.07381	19.2549
Hrc	ENSMUSG00000038239.11	down	-1.00361	7.26502e-06	0.000624754	61.0672
Gm43274	ENSMUSG00000107116.1	down	-1.0051	0.00400341	0.0522947	22.6241
D430040D24Rik	ENSMUSG00000087589.3	down	-1.0096	0.00599681	0.0675834	28.7609
Gm43119	ENSMUSG00000106560.1	down	-1.0161	0.00374638	0.0500076	23.2105
Gm26614	ENSMUSG00000097240.1	down	-1.01854	0.011125	0.098647	20.1403
Gas1	ENSMUSG00000052957.8	down	-1.02316	1.47488e-07	3.31418e-05	1365.15
Adam11	ENSMUSG00000020926.16	down	-1.0237	1.43394e-10	2.82837e-07	210.641
Gm37699	ENSMUSG00000103674.1	down	-1.02749	1.62267e-05	0.00111219	53.911
Nr1d1	ENSMUSG00000020889.11	down	-1.0319	2.34713e-05	0.00151514	555.12
Tmem82	ENSMUSG00000043085.14	down	-1.03757	2.73944e-05	0.0017184	142.379
Gm42838	ENSMUSG00000105604.1	down	-1.04708	0.000741868	0.0178209	26.2557
Angel1	ENSMUSG00000021257.14	down	-1.0474	0.00590966	0.0670829	18.9894
A730090N16Rik	ENSMUSG00000090120.1	down	-1.05105	0.00973804	0.0918542	17.2406
Por	ENSMUSG00000005514.14	down	-1.05131	2.46166e-11	8.63564e-08	1955.09
Kirrel3	ENSMUSG00000032036.15	down	-1.05146	0.00820338	0.0830254	15.1311
Kcnj11	ENSMUSG00000096146.2	down	-1.05171	3.23413e-05	0.00194618	49.6535
Ankrd6	ENSMUSG00000040183.13	down	-1.05291	0.00775664	0.0799163	18.1568
Gm12394	ENSMUSG00000078722.2	down	-1.05851	1.02776e-05	0.000778343	55.492
Gm29151	ENSMUSG00000106005.1	down	-1.05862	0.0055226	0.0641507	21.7262
Gm37334	ENSMUSG00000104525.1	down	-1.06054	0.000351156	0.0108413	30.7276
CT009696.4	ENSMUSG00000111854.1	down	-1.06093	0.00396704	0.0520371	27.2199
Fam205a1	ENSMUSG00000078721.1	down	-1.06246	0.00048731	0.0135804	33.8707
Zfp703	ENSMUSG00000085795.8	down	-1.06313	5.17892e-09	2.87301e-06	176.446
Fkbp5	ENSMUSG00000024222.16	down	-1.07016	0.00360308	0.0490961	451.545
Bdkrb2	ENSMUSG00000021070.6	down	-1.07228	0.00176029	0.0312899	42.0775
Per1	ENSMUSG00000020893.17	down	-1.07483	3.61719e-09	2.21806e-06	1070.8
Gm43788	ENSMUSG00000107286.1	down	-1.07728	0.000150583	0.0059936	31.0972
Kcna5	ENSMUSG00000045534.4	down	-1.07782	0.00261311	0.0406571	24.9886
Dnm3	ENSMUSG00000040265.16	down	-1.07845	2.31331e-05	0.00150424	50.828
Lcn8	ENSMUSG00000036449.6	down	-1.07922	0.0011342	0.0236042	32.9178
Dlk1	ENSMUSG00000040856.17	down	-1.08359	0.00208162	0.0346	27.6807
Cirbp	ENSMUSG00000045193.13	down	-1.08697	0.00702535	0.0750685	345.565
Gm45371	ENSMUSG00000109954.1	down	-1.08926	0.000483724	0.0135299	33.1803
Ppnr	ENSMUSG00000099746.1	down	-1.09284	0.000761476	0.018098	23.4984
Sptb	ENSMUSG00000021061.15	down	-1.09318	5.60123e-11	1.42047e-07	146.79
ENSMUSG00000096237.1	ENSMUSG00000096237.1	down	-1.09756	6.26011e-06	0.000564109	66.9542
Adrb2	ENSMUSG00000045730.3	down	-1.09853	0.00181784	0.0318247	20.8203
A930012O16Rik	ENSMUSG00000054181.11	down	-1.10262	0.00579732	0.0663984	14.8525
Spsb1	ENSMUSG00000039911.13	down	-1.10406	0.000532433	0.0144015	768.216
Gm10600	ENSMUSG00000083929.3	down	-1.1045	0.00415888	0.0534136	43.3264
Foxo6	ENSMUSG00000052135.8	down	-1.11125	0.00215294	0.0353776	32.5106
Foxf1	ENSMUSG00000042812.5	down	-1.11242	5.97446e-07	0.000100055	61.2085
Osbp2	ENSMUSG00000020435.17	down	-1.12589	0.00964371	0.0916474	13.9362
Fam13a	ENSMUSG00000037709.13	down	-1.12718	0.00196313	0.0334127	324.254
Gm11618	ENSMUSG00000083991.1	down	-1.12985	0.00303095	0.0447705	22.0094
Gprin2	ENSMUSG00000071531.3	down	-1.13145	7.62833e-07	0.000119839	70.8339
Tcap	ENSMUSG00000007877.2	down	-1.1324	0.000919773	0.0205899	41.858
Gm38036	ENSMUSG00000102841.1	down	-1.13356	0.00617972	0.0689952	13.9094
Gm13070	ENSMUSG00000086767.1	down	-1.15431	8.65807e-06	0.000699202	78.2672
4932702P03Rik	ENSMUSG00000086796.2	down	-1.15807	0.00673206	0.0733175	14.2186
Tnnt3	ENSMUSG00000061723.18	down	-1.16362	0.000166278	0.00641689	27.9844
Stc2	ENSMUSG00000020303.2	down	-1.16425	2.91876e-11	8.63564e-08	172.899
Ccdc88b	ENSMUSG00000047810.8	down	-1.16538	0.00874542	0.0861763	13.1179
Gm26813	ENSMUSG00000097819.1	down	-1.17796	0.00303144	0.0447705	15.5302
Klf15	ENSMUSG00000030087.11	down	-1.18101	0.000853021	0.0194388	510.53
Gm26908	ENSMUSG00000097243.1	down	-1.18141	0.00482946	0.0587612	13.2395
Gm28373	ENSMUSG00000096751.3	down	-1.18251	0.00241754	0.0382518	20.5002
Rgma	ENSMUSG00000070509.15	down	-1.18546	8.98086e-08	2.53061e-05	137.896
Pik3ip1	ENSMUSG00000034614.14	down	-1.20125	0.00247921	0.0389822	296.481
Kdm6bos	ENSMUSG00000085178.1	down	-1.20444	0.000180775	0.00675603	32.8448
Klhl33	ENSMUSG00000090799.2	down	-1.20611	0.00886874	0.0869142	17.6855
Pla2g4e	ENSMUSG00000050211.14	down	-1.21237	0.00334173	0.0473949	23.8096
Pdk4	ENSMUSG00000019577.6	down	-1.21387	2.76589e-08	1.09111e-05	580.11
CT009480.2	ENSMUSG00000114310.1	down	-1.21485	0.00312626	0.0457899	14.5519
Moxd1	ENSMUSG00000020000.7	down	-1.2196	0.000851718	0.0194341	23.9028
Grp	ENSMUSG00000024517.16	down	-1.22461	0.00816201	0.0827009	25.9046
Slc25a33	ENSMUSG00000028982.9	down	-1.24288	1.0198e-05	0.000778343	73.8627
Adamts15	ENSMUSG00000033453.8	down	-1.24505	2.12617e-09	1.64103e-06	793.765
Gm13068	ENSMUSG00000085403.1	down	-1.24577	0.00162432	0.0297266	21.0846
Gm45804	ENSMUSG00000110442.1	down	-1.24786	0.00325282	0.0467755	14.3887
Gm22973	ENSMUSG00000065232.1	down	-1.25057	0.00186518	0.0323874	18.759
Lrrc29	ENSMUSG00000041679.9	down	-1.2535	0.00970358	0.0917148	19.641
Gm3892	ENSMUSG00000095348.1	down	-1.25843	0.000712436	0.017379	54.7232
Kcna2	ENSMUSG00000040724.5	down	-1.26193	9.86041e-05	0.00442563	62.208
Sik1	ENSMUSG00000024042.6	down	-1.26803	1.63001e-07	3.52878e-05	230.97
Rnf182	ENSMUSG00000044164.2	down	-1.26885	0.000838807	0.0193338	18.8893
Gm13301	ENSMUSG00000096862.1	down	-1.26941	0.00150134	0.0282927	208.736
Gm43052	ENSMUSG00000107115.1	down	-1.28335	0.0113953	0.0997974	10.7162
Gm44913	ENSMUSG00000109051.1	down	-1.28588	0.00115914	0.0239826	18.0808
Gm14285	ENSMUSG00000087524.1	down	-1.30405	4.09548e-06	0.000408976	84.7724
Col6a5	ENSMUSG00000091345.9	down	-1.30454	6.59985e-05	0.0033003	61.0588
Mir143	ENSMUSG00000065445.3	down	-1.31529	0.000575629	0.0152062	23.7329
Gm26823	ENSMUSG00000096926.1	down	-1.31699	0.00330287	0.0470943	12.3871
Socs1	ENSMUSG00000038037.4	down	-1.31863	1.10072e-05	0.000821011	60.5411
Gm38066	ENSMUSG00000104486.1	down	-1.32163	0.00527568	0.0620635	12.4316
Gm44283	ENSMUSG00000107586.1	down	-1.32361	0.0040007	0.0522947	13.3528
AC154176.2	ENSMUSG00000114501.1	down	-1.3252	0.00207146	0.0344959	17.3256
Gm11827	ENSMUSG00000086765.7	down	-1.3348	1.01306e-05	0.000778343	42.6578
Gm10593	ENSMUSG00000095258.1	down	-1.33513	0.000540441	0.0145588	53.7308
Ccr9	ENSMUSG00000029530.16	down	-1.33794	0.0101179	0.0937245	19.6331
Tbx6	ENSMUSG00000030699.16	down	-1.33816	0.0110205	0.0980312	9.93256
Pdzd3	ENSMUSG00000032105.5	down	-1.35384	0.0019117	0.0327306	13.9448
Gm17167	ENSMUSG00000091542.1	down	-1.36029	8.55481e-10	8.43694e-07	202.861
Galnt15	ENSMUSG00000021903.11	down	-1.37318	0.00426055	0.054142	730.565
3425401B19Rik	ENSMUSG00000071540.4	down	-1.37692	8.10172e-08	2.3197e-05	116.451
Smim3	ENSMUSG00000038059.6	down	-1.3774	2.74568e-10	4.42827e-07	206.971
Usp2	ENSMUSG00000032010.15	down	-1.37782	1.26703e-10	2.81155e-07	77.489
Adra1d	ENSMUSG00000027335.9	down	-1.38921	3.23374e-09	2.21245e-06	450.772
Olfr920	ENSMUSG00000061039.5	down	-1.39189	0.00677306	0.0736079	9.32901
8430408G22Rik	ENSMUSG00000048489.12	down	-1.40957	0.00586223	0.066752	107.079
mt-Tg	ENSMUSG00000064359.1	down	-1.41174	0.00200758	0.0339435	17.4475
Gm17081	ENSMUSG00000090338.1	down	-1.41735	0.000339025	0.010652	24.005
Gm12200	ENSMUSG00000085902.1	down	-1.43648	0.00568749	0.0656465	11.2602
ENSMUSG00000096506.1	ENSMUSG00000096506.1	down	-1.45796	0.000712018	0.017379	18.9522
Cecr2	ENSMUSG00000071226.11	down	-1.46217	4.47359e-05	0.002474	21.6278
Tgfbr3l	ENSMUSG00000089736.2	down	-1.48344	0.00207987	0.0346	12.0044
4930545L23Rik	ENSMUSG00000085247.1	down	-1.48733	0.00508093	0.0604731	9.08765
Aplnr	ENSMUSG00000044338.9	down	-1.50078	3.48324e-05	0.0020527	36.1213
Tfap4	ENSMUSG00000005718.7	down	-1.50342	0.000736814	0.0177475	13.7082
2810454H06Rik	ENSMUSG00000100876.1	down	-1.50417	0.0112258	0.0991534	11.6154
Magix	ENSMUSG00000031147.8	down	-1.51547	0.00410875	0.0531235	9.60666
Gm5859	ENSMUSG00000073879.4	down	-1.51817	2.74316e-08	1.09111e-05	87.1995
Gm45061	ENSMUSG00000108075.1	down	-1.53771	0.00035299	0.010879	22.6387
Aspg	ENSMUSG00000037686.6	down	-1.54448	0.000727451	0.0175764	40.759
Atcay	ENSMUSG00000034958.11	down	-1.5505	0.0032393	0.0466754	26.3336
Hif3a	ENSMUSG00000004328.15	down	-1.55494	9.3561e-14	8.30448e-10	83.2875
Gm43923	ENSMUSG00000108256.1	down	-1.56522	0.00715674	0.0758139	12.0858
Car4	ENSMUSG00000000805.18	down	-1.60417	1.02732e-05	0.000778343	21.8889
Ppp1r1b	ENSMUSG00000061718.12	down	-1.61591	9.11131e-06	0.000725309	39.7197
Gm44417	ENSMUSG00000107865.1	down	-1.64224	0.00014801	0.00591774	17.9469
Mst1	ENSMUSG00000032591.15	down	-1.64764	0.0019068	0.0327306	8.93096
Bmf	ENSMUSG00000040093.15	down	-1.65825	3.95442e-06	0.000398857	697.314
Trim9	ENSMUSG00000021071.16	down	-1.66483	9.38675e-05	0.00426173	18.7468
Gm26772	ENSMUSG00000097136.1	down	-1.66863	0.000124599	0.00515589	15.6743
AC154433.1	ENSMUSG00000114751.1	down	-1.68031	0.00546443	0.0636596	9.04779
4930578G10Rik	ENSMUSG00000054885.11	down	-1.71274	0.00092678	0.0206485	16.3638
Gm13302	ENSMUSG00000084010.1	down	-1.76272	1.32973e-06	0.000180738	24.7587
Ciart	ENSMUSG00000038550.10	down	-1.78978	5.47083e-06	0.000508472	19.7898
Fam107a	ENSMUSG00000021750.15	down	-1.79675	1.31525e-05	0.000952992	366.272
Arrdc2	ENSMUSG00000002910.11	down	-1.80323	0.000120165	0.00510045	137.612
CT030170.4	ENSMUSG00000113536.1	down	-1.82922	1.90309e-07	4.02186e-05	34.3949
Ddit4	ENSMUSG00000020108.4	down	-1.83402	0.00133066	0.0259979	170.399
C230085N15Rik	ENSMUSG00000102212.1	down	-1.89165	0.0106002	0.0958119	9.46925
1700003D09Rik	ENSMUSG00000085944.1	down	-1.90598	0.0011559	0.0239434	9.69024
Fam47e	ENSMUSG00000057068.15	down	-1.91935	3.05182e-05	0.0018746	16.4381
Tmem52	ENSMUSG00000023153.9	down	-2.06963	5.25891e-08	1.64285e-05	24.1815
Gm128	ENSMUSG00000068860.5	down	-2.09272	0.000653784	0.0164624	9.55968
Kcnt1	ENSMUSG00000058740.14	down	-2.21638	4.65094e-06	0.000451167	19.5826
BB365896	ENSMUSG00000092323.1	down	-2.34971	5.55445e-05	0.00287471	18.2185
Gm2163	ENSMUSG00000095779.1	down	-2.48274	7.08771e-05	0.00346049	9.70871
Gm13299	ENSMUSG00000087577.1	down	-2.65924	3.33068e-06	0.000347801	17.6311
Hbb-bh3	ENSMUSG00000083216.2	down	-8.4927	0.000264212	0.00893387	361.639
