# Supplementary material for: Copper-Binding Domain Variation in a Novel Murine Lysyl Oxidase Model Produces Structurally Inferior Aortic Elastic Fibers Whose Failure Is Modified by Age, Sex, and Blood Pressure
Source: Int J Mol Sci. 2022 Jun 17;23(12):6749. doi: 10.3390/ijms23126749 (PMC9223555; doi:10.3390/ijms23126749)
Supplement: Supplementary file 1 [file ijms-23-06749-s001.zip › Supplemental Table S3.xlsx]

## Sheet: Supplemental 3A
Supplemental Table III: Upregulated Canonical Pathways in Lox+/C285F vs Lox+/+ aortas
Gene set enrichment analysis for Lox +/C285F vs Lox+/+ aortas. Below are the top 100 enriched canonical pathways in the upregulated genes (>1.5X increase, 0.1FDR), at right are the genes in each pathway with genes in each pathway indicated as "1" and non included genes as "0"
Overlap Results
Collection(s):	Canonical Pathways (CP)
# overlaps shown:	100
# genesets in collections:	2232
# genes in comparison (n):	320
# genes in universe (N):	38404
MSigDB Gene Set Name	# Genes in Gene Set (K)	# Genes in Overlap (k)	k/K	p-value	FDR q-value		PDGFA	FGF2	FGF1	FGF7	FGF16	HBEGF	EREG	ANXA1	PLAU	SDC4	SERPINE1	SERPINB8	CD109	BDNF	IHH	BMP4	BMP2	FST	GDF6	WIF1	IL17B	S100A4	S100A6	P4HA1	PLOD2	P3H2	ITIH2	SERPINI1	CELA1	COLEC11	FCN1	ANXA3	CLEC11A	CCN1	MMRN1	NCAN	ACAN	COL19A1	CCN2	TNFAIP6	CILP2	CCN5	H3C6
Naba Matrisome	1026	42	0.0409	2.2e-17	4.92e-14		1	1	1	1	1	1	1	1	1	1	1	1	1	1	1	1	1	1	1	1	1	1	1	1	1	1	1	1	1	1	1	1	1	1	1	1	1	1	1	1	1	1	0
Naba Matrisome Associated	751	33	0.0439	1.02e-14	1.14e-11		1	1	1	1	1	1	1	1	1	1	1	1	1	1	1	1	1	1	1	1	1	1	1	1	1	1	1	1	1	1	1	1	1	0	0	0	0	0	0	0	0	0	0
Reactome Cytokine Signaling In Immune System	858	30	0.035	5.24e-11	3.9e-08		1	1	1	1	1	1	1	1	0	0	0	0	0	0	0	0	0	0	0	0	0	0	0	0	0	0	0	0	0	0	0	0	0	0	0	0	0	0	0	0	0	0	1
Reactome Cell Cycle Mitotic	560	24	0.0429	8.49e-11	4.74e-08		0	0	0	0	0	0	0	0	0	0	0	0	0	0	0	0	0	0	0	0	0	0	0	0	0	0	0	0	0	0	0	0	0	0	0	0	0	0	0	0	0	0	1
PID AP1 Pathway	70	10	0.1429	3.57e-10	1.6e-07		0	0	0	0	0	0	0	0	1	0	0	0	0	0	0	0	0	0	0	0	0	0	0	0	0	0	0	0	0	0	0	0	0	1	0	0	0	0	0	0	0	0	0
Reactome Cellular Responses To External Stimuli	612	24	0.0392	5.06e-10	1.88e-07		0	0	0	0	0	0	0	0	0	0	0	0	0	0	0	0	0	0	0	0	0	0	0	0	0	0	0	0	0	0	0	0	0	0	0	0	0	0	0	0	0	0	1
Reactome Hemostasis	678	25	0.0369	7.73e-10	2.22e-07		1	0	0	0	0	0	0	0	1	1	1	1	1	0	0	0	0	0	0	0	0	0	0	0	0	0	0	0	0	0	0	0	0	0	1	0	0	0	0	0	0	0	1
Reactome Disease	1470	38	0.0259	7.94e-10	2.22e-07		1	1	1	1	1	1	1	0	0	1	0	0	0	1	1	0	0	0	0	0	0	0	0	0	0	0	0	0	0	0	0	0	0	0	0	1	1	0	0	0	0	0	1
Reactome HSP90 Chaperone Cycle For Steroid Hormone Receptors SHR	57	9	0.1579	1.1e-09	2.72e-07		0	0	0	0	0	0	0	0	0	0	0	0	0	0	0	0	0	0	0	0	0	0	0	0	0	0	0	0	0	0	0	0	0	0	0	0	0	0	0	0	0	0	0
Reactome Signaling By Rho GTPases	454	20	0.0441	2.06e-09	4.61e-07		0	0	0	0	0	0	0	0	0	0	0	0	0	0	0	0	0	0	0	0	0	0	0	0	0	0	0	0	0	0	0	0	0	0	0	0	0	0	0	0	0	0	1
Reactome M Phase	416	19	0.0457	2.93e-09	5.94e-07		0	0	0	0	0	0	0	0	0	0	0	0	0	0	0	0	0	0	0	0	0	0	0	0	0	0	0	0	0	0	0	0	0	0	0	0	0	0	0	0	0	0	1
Reactome Cell Cycle	674	24	0.0356	3.37e-09	6.26e-07		0	0	0	0	0	0	0	0	0	0	0	0	0	0	0	0	0	0	0	0	0	0	0	0	0	0	0	0	0	0	0	0	0	0	0	0	0	0	0	0	0	0	1
Naba Secreted Factors	343	17	0.0496	6.05e-09	1.04e-06		1	1	1	1	1	1	1	0	0	0	0	0	0	1	1	1	1	1	1	1	1	1	1	0	0	0	0	0	0	0	0	0	0	0	0	0	0	0	0	0	0	0	0
Reactome Rho GTPase Effectors	324	16	0.0494	1.79e-08	2.85e-06		0	0	0	0	0	0	0	0	0	0	0	0	0	0	0	0	0	0	0	0	0	0	0	0	0	0	0	0	0	0	0	0	0	0	0	0	0	0	0	0	0	0	1
Reactome Mitotic Prometaphase	203	13	0.064	1.92e-08	2.85e-06		0	0	0	0	0	0	0	0	0	0	0	0	0	0	0	0	0	0	0	0	0	0	0	0	0	0	0	0	0	0	0	0	0	0	0	0	0	0	0	0	0	0	0
KEGG MAPK Signaling Pathway	267	14	0.0524	6.72e-08	9.38e-06		1	1	1	1	1	0	0	0	0	0	0	0	0	1	0	0	0	0	0	0	0	0	0	0	0	0	0	0	0	0	0	0	0	0	0	0	0	0	0	0	0	0	0
Reactome Resolution of Sister Chromatid Cohesion	126	10	0.0794	1.15e-07	1.51e-05		0	0	0	0	0	0	0	0	0	0	0	0	0	0	0	0	0	0	0	0	0	0	0	0	0	0	0	0	0	0	0	0	0	0	0	0	0	0	0	0	0	0	0
Reactome Mapk Family Signaling Cascades	296	14	0.0473	2.38e-07	2.91e-05		1	1	1	1	1	1	1	0	0	0	0	0	0	0	0	0	0	0	0	0	0	0	0	0	0	0	0	0	0	0	0	0	0	0	0	0	0	0	0	0	0	0	0
Reactome Signaling By Nuclear Receptors	297	14	0.0471	2.47e-07	2.91e-05		0	0	0	0	0	1	1	0	0	0	0	0	0	0	0	0	0	0	0	0	0	0	0	0	0	0	0	0	0	0	0	0	0	0	0	0	0	0	0	0	0	0	1
PID ATF2 Pathway	59	7	0.1186	6.15e-07	6.86e-05		0	0	0	0	0	0	0	0	1	0	0	0	0	0	0	0	0	0	0	0	0	0	0	0	0	0	0	0	0	0	0	0	0	0	0	0	0	0	0	0	0	0	0
KEGG Gap Junction	90	8	0.0889	9.12e-07	9.7e-05		1	0	0	0	0	0	0	0	0	0	0	0	0	0	0	0	0	0	0	0	0	0	0	0	0	0	0	0	0	0	0	0	0	0	0	0	0	0	0	0	0	0	0
Reactome Signaling By Receptor Tyrosine Kinases	504	17	0.0337	1.43e-06	0.000146		1	1	1	1	1	1	1	0	0	0	0	0	0	1	0	0	0	0	0	0	0	0	0	0	0	0	0	0	0	0	0	0	0	0	0	0	0	0	0	0	0	0	0
Reactome Extracellular Matrix Organization	301	13	0.0432	1.77e-06	0.000168		1	1	0	0	0	0	0	0	0	1	1	0	0	0	0	1	1	0	0	0	0	0	0	1	1	1	0	0	0	0	0	0	0	0	0	1	1	1	0	0	0	0	0
Reactome Cholesterol Biosynthesis	25	5	0.2	1.8e-06	0.000168		0	0	0	0	0	0	0	0	0	0	0	0	0	0	0	0	0	0	0	0	0	0	0	0	0	0	0	0	0	0	0	0	0	0	0	0	0	0	0	0	0	0	0
Reactome HCMV Early Events	138	9	0.0652	2.59e-06	0.000231		0	0	0	0	0	0	0	0	0	0	0	0	0	0	0	0	0	0	0	0	0	0	0	0	0	0	0	0	0	0	0	0	0	0	0	0	0	0	0	0	0	0	1
Reactome ESR Mediated Signaling	221	11	0.0498	2.87e-06	0.000232		0	0	0	0	0	1	1	0	0	0	0	0	0	0	0	0	0	0	0	0	0	0	0	0	0	0	0	0	0	0	0	0	0	0	0	0	0	0	0	0	0	0	1
Reactome Condensation of Prophase Chromosomes	74	7	0.0946	2.91e-06	0.000232		0	0	0	0	0	0	0	0	0	0	0	0	0	0	0	0	0	0	0	0	0	0	0	0	0	0	0	0	0	0	0	0	0	0	0	0	0	0	0	0	0	0	1
Reactome Rho GTPases Activate Formins	140	9	0.0643	2.92e-06	0.000232		0	0	0	0	0	0	0	0	0	0	0	0	0	0	0	0	0	0	0	0	0	0	0	0	0	0	0	0	0	0	0	0	0	0	0	0	0	0	0	0	0	0	0
Reactome Dissolution of Fibrin Clot	13	4	0.3077	3.19e-06	0.000237		0	0	0	0	0	0	0	0	1	0	1	1	0	0	0	0	0	0	0	0	0	0	0	0	0	0	0	0	0	0	0	0	0	0	0	0	0	0	0	0	0	0	0
Reactome Constitutive Signaling By Aberrant PI3K In Cancer	75	7	0.0933	3.19e-06	0.000237		1	1	1	1	1	1	1	0	0	0	0	0	0	0	0	0	0	0	0	0	0	0	0	0	0	0	0	0	0	0	0	0	0	0	0	0	0	0	0	0	0	0	0
KEGG Pathways In Cancer	325	13	0.04	4.09e-06	0.000291		1	1	1	1	1	0	0	0	0	0	0	0	0	0	0	1	1	0	0	0	0	0	0	0	0	0	0	0	0	0	0	0	0	0	0	0	0	0	0	0	0	0	0
Reactome Negative Regulation of The PI3K AKT Network	110	8	0.0727	4.18e-06	0.000291		1	1	1	1	1	1	1	0	0	0	0	0	0	0	0	0	0	0	0	0	0	0	0	0	0	0	0	0	0	0	0	0	0	0	0	0	0	0	0	0	0	0	0
Reactome Senescence Associated Secretory Phenotype SASP	111	8	0.0721	4.47e-06	0.000302		0	0	0	0	0	0	0	0	0	0	0	0	0	0	0	0	0	0	0	0	0	0	0	0	0	0	0	0	0	0	0	0	0	0	0	0	0	0	0	0	0	0	1
Reactome Estrogen Dependent Gene Expression	150	9	0.06	5.14e-06	0.00033		0	0	0	0	0	0	0	0	0	0	0	0	0	0	0	0	0	0	0	0	0	0	0	0	0	0	0	0	0	0	0	0	0	0	0	0	0	0	0	0	0	0	1
Reactome Mitotic Metaphase And Anaphase	235	11	0.0468	5.17e-06	0.00033		0	0	0	0	0	0	0	0	0	0	0	0	0	0	0	0	0	0	0	0	0	0	0	0	0	0	0	0	0	0	0	0	0	0	0	0	0	0	0	0	0	0	0
PID FGF Pathway	55	6	0.1091	6.57e-06	0.000407		0	1	1	0	0	0	0	0	1	0	0	0	0	0	0	0	0	0	0	0	0	0	0	0	0	0	0	0	0	0	0	0	0	0	0	0	0	0	0	0	0	0	0
Reactome Negative Regulation of FGFR2 Signaling	34	5	0.1471	8.88e-06	0.000536		0	1	1	1	1	0	0	0	0	0	0	0	0	0	0	0	0	0	0	0	0	0	0	0	0	0	0	0	0	0	0	0	0	0	0	0	0	0	0	0	0	0	0
Reactome HCMV Infection	162	9	0.0556	9.58e-06	0.000563		0	0	0	0	0	0	0	0	0	0	0	0	0	0	0	0	0	0	0	0	0	0	0	0	0	0	0	0	0	0	0	0	0	0	0	0	0	0	0	0	0	0	1
PID Integrin5 Pathway	17	4	0.2353	1.03e-05	0.000592		0	0	0	0	0	0	0	0	1	0	0	0	0	0	0	0	0	0	0	0	0	0	0	0	0	0	0	0	0	0	0	0	0	1	0	0	0	0	0	0	0	0	0
Reactome Post Translational Protein Modification	1430	29	0.0203	1.12e-05	0.000627		0	0	0	0	0	0	0	0	0	0	0	0	1	0	0	1	0	0	0	0	0	0	0	0	0	0	1	0	0	0	0	0	0	1	0	0	0	0	0	0	0	0	0
Reactome Phospholipase C Mediated Cascade FGFR2	18	4	0.2222	1.32e-05	0.000708		0	1	1	1	1	0	0	0	0	0	0	0	0	0	0	0	0	0	0	0	0	0	0	0	0	0	0	0	0	0	0	0	0	0	0	0	0	0	0	0	0	0	0
KEGG Regulation of Actin Cytoskeleton	213	10	0.0469	1.35e-05	0.000708		1	1	1	1	1	0	0	0	0	0	0	0	0	0	0	0	0	0	0	0	0	0	0	0	0	0	0	0	0	0	0	0	0	0	0	0	0	0	0	0	0	0	0
PID FRA Pathway	37	5	0.1351	1.36e-05	0.000708		0	0	0	0	0	0	0	0	1	0	0	0	0	0	0	0	0	0	0	0	0	0	0	0	0	0	0	0	0	0	0	0	0	0	0	0	0	0	0	0	0	0	0
Reactome RNA Polymerase Ii Transcription	1375	28	0.0204	1.49e-05	0.000754		0	0	0	0	0	0	0	0	0	0	1	0	0	1	1	0	1	0	0	0	0	0	0	0	0	0	0	0	0	0	0	0	0	0	0	0	0	0	1	0	0	0	1
Reactome FIT3 Signaling	265	11	0.0415	1.6e-05	0.000777		1	1	1	1	1	1	1	0	0	0	0	0	0	0	0	0	0	0	0	0	0	0	0	0	0	0	0	0	0	0	0	0	0	0	0	0	0	0	0	0	0	0	0
Reactome Response To Elevated Platelet Cytosolic Ca2	132	8	0.0606	1.6e-05	0.000777		1	0	0	0	0	0	0	0	0	0	1	0	1	0	0	0	0	0	0	0	0	0	0	0	0	0	0	0	0	0	0	0	0	0	1	0	0	0	0	0	0	0	0
Reactome Infectious Disease	804	20	0.0249	1.67e-05	0.000792		0	0	0	0	0	1	0	0	0	0	0	0	0	0	0	0	0	0	0	0	0	0	0	0	0	0	0	0	0	0	0	0	0	0	0	0	0	0	0	0	0	0	1
Reactome FGFR2 Ligand Binding And Activation	20	4	0.2	2.06e-05	0.000956		0	1	1	1	1	0	0	0	0	0	0	0	0	0	0	0	0	0	0	0	0	0	0	0	0	0	0	0	0	0	0	0	0	0	0	0	0	0	0	0	0	0	0
PID P53 Downstream Pathway	137	8	0.0584	2.1e-05	0.000956		0	0	0	0	0	0	0	0	0	0	1	0	0	0	0	0	0	0	0	0	0	0	0	0	0	0	0	0	0	0	0	0	0	0	0	0	0	0	0	0	0	0	0
Reactome SIRT1 Negatively Regulates rRNA Expression	68	6	0.0882	2.26e-05	0.00101		0	0	0	0	0	0	0	0	0	0	0	0	0	0	0	0	0	0	0	0	0	0	0	0	0	0	0	0	0	0	0	0	0	0	0	0	0	0	0	0	0	0	1
Reactome Cellular Response To Heat Stress	101	7	0.0693	2.3e-05	0.00101		0	0	0	0	0	0	0	0	0	0	0	0	0	0	0	0	0	0	0	0	0	0	0	0	0	0	0	0	0	0	0	0	0	0	0	0	0	0	0	0	0	0	0
Reactome Signaling By GPCR	1184	25	0.0211	2.4e-05	0.00103		0	0	0	0	0	1	0	1	0	1	0	0	0	0	1	0	0	0	0	0	0	0	0	0	0	0	0	0	0	0	0	0	0	0	0	0	0	0	0	0	0	0	0
Reactome PI3k AKT Signaling In Cancer	102	7	0.0686	2.45e-05	0.00103		1	1	1	1	1	1	1	0	0	0	0	0	0	0	0	0	0	0	0	0	0	0	0	0	0	0	0	0	0	0	0	0	0	0	0	0	0	0	0	0	0	0	0
Reactome Activation of Gene Expression By SREBF SREBP	42	5	0.119	2.57e-05	0.00106		0	0	0	0	0	0	0	0	0	0	0	0	0	0	0	0	0	0	0	0	0	0	0	0	0	0	0	0	0	0	0	0	0	0	0	0	0	0	0	0	0	0	0
Reactome Mitotic Prophase	143	8	0.0559	2.86e-05	0.00116		0	0	0	0	0	0	0	0	0	0	0	0	0	0	0	0	0	0	0	0	0	0	0	0	0	0	0	0	0	0	0	0	0	0	0	0	0	0	0	0	0	0	1
Biocarta Eicosanoid Pathway	22	4	0.1818	3.07e-05	0.00123		0	0	0	0	0	0	0	0	0	0	0	0	0	0	0	0	0	0	0	0	0	0	0	0	0	0	0	0	0	0	0	0	0	0	0	0	0	0	0	0	0	0	0
Reactome AURKA Activation By TPX2	72	6	0.0833	3.14e-05	0.00123		0	0	0	0	0	0	0	0	0	0	0	0	0	0	0	0	0	0	0	0	0	0	0	0	0	0	0	0	0	0	0	0	0	0	0	0	0	0	0	0	0	0	0
Reactome Separation of Sister Chromatids	190	9	0.0474	3.4e-05	0.00131		0	0	0	0	0	0	0	0	0	0	0	0	0	0	0	0	0	0	0	0	0	0	0	0	0	0	0	0	0	0	0	0	0	0	0	0	0	0	0	0	0	0	0
Naba ECM Regulators	238	10	0.042	3.5e-05	0.00132		0	0	0	0	0	0	0	0	1	0	1	1	1	0	0	0	0	0	0	0	0	0	0	1	1	1	1	1	1	0	0	0	0	0	0	0	0	0	0	0	0	0	0
Reactome PI3k Cascade FGFR2	23	4	0.1739	3.7e-05	0.00138		0	1	1	1	1	0	0	0	0	0	0	0	0	0	0	0	0	0	0	0	0	0	0	0	0	0	0	0	0	0	0	0	0	0	0	0	0	0	0	0	0	0	0
Reactome Cell Cycle Checkpoints	291	11	0.0378	3.77e-05	0.00138		0	0	0	0	0	0	0	0	0	0	0	0	0	0	0	0	0	0	0	0	0	0	0	0	0	0	0	0	0	0	0	0	0	0	0	0	0	0	0	0	0	0	0
Reactome Mitotic Spindle Checkpoint	110	7	0.0636	3.99e-05	0.00144		0	0	0	0	0	0	0	0	0	0	0	0	0	0	0	0	0	0	0	0	0	0	0	0	0	0	0	0	0	0	0	0	0	0	0	0	0	0	0	0	0	0	0
Reactome Interleukin 4 And Interleukin 13 Signaling	111	7	0.0631	4.23e-05	0.0015		0	1	0	0	0	0	0	1	0	0	0	0	0	0	0	0	0	0	0	0	0	0	0	0	0	0	0	0	0	0	0	0	0	0	0	0	0	0	0	0	0	0	0
Reactome Erythrocytes Take Up Oxygen And Release Carbon Dioxide	9	3	0.3333	4.64e-05	0.00162		0	0	0	0	0	0	0	0	0	0	0	0	0	0	0	0	0	0	0	0	0	0	0	0	0	0	0	0	0	0	0	0	0	0	0	0	0	0	0	0	0	0	0
Reactome Mitotic G2 G2 M Phases	200	9	0.045	5.07e-05	0.00174		0	0	0	0	0	0	0	0	0	0	0	0	0	0	0	0	0	0	0	0	0	0	0	0	0	0	0	0	0	0	0	0	0	0	0	0	0	0	0	0	0	0	0
Reactome Frs Mediated FGFR2 Signaling	25	4	0.16	5.21e-05	0.00176		0	1	1	1	1	0	0	0	0	0	0	0	0	0	0	0	0	0	0	0	0	0	0	0	0	0	0	0	0	0	0	0	0	0	0	0	0	0	0	0	0	0	0
Reactome Interferon Signaling	202	9	0.0446	5.47e-05	0.00182		0	0	0	0	0	0	0	0	0	0	0	0	0	0	0	0	0	0	0	0	0	0	0	0	0	0	0	0	0	0	0	0	0	0	0	0	0	0	0	0	0	0	0
Reactome Intracellular Signaling By Second Messengers	304	11	0.0362	5.59e-05	0.00183		1	1	1	1	1	1	1	0	0	0	0	0	0	0	0	0	0	0	0	0	0	0	0	0	0	0	0	0	0	0	0	0	0	0	0	0	0	0	0	0	0	0	0
PID SMAD2/3 nuclear Pathway	82	6	0.0732	6.57e-05	0.00204		0	0	0	0	0	0	0	0	0	0	1	0	0	0	0	0	0	0	0	0	0	0	0	0	0	0	0	0	0	0	0	0	0	0	0	0	0	0	0	0	0	0	0
Reactome Regulation of HSF1 Mediated Heat Shock Response	82	6	0.0732	6.57e-05	0.00204		0	0	0	0	0	0	0	0	0	0	0	0	0	0	0	0	0	0	0	0	0	0	0	0	0	0	0	0	0	0	0	0	0	0	0	0	0	0	0	0	0	0	0
Biocarta RANMS Pathway	10	3	0.3	6.59e-05	0.00204		0	0	0	0	0	0	0	0	0	0	0	0	0	0	0	0	0	0	0	0	0	0	0	0	0	0	0	0	0	0	0	0	0	0	0	0	0	0	0	0	0	0	0
Reactome FGFR2B Ligand Binding And Activation	10	3	0.3	6.59e-05	0.00204		0	1	1	1	0	0	0	0	0	0	0	0	0	0	0	0	0	0	0	0	0	0	0	0	0	0	0	0	0	0	0	0	0	0	0	0	0	0	0	0	0	0	0
Reactome Attenuation Phase	28	4	0.1429	8.27e-05	0.00253		0	0	0	0	0	0	0	0	0	0	0	0	0	0	0	0	0	0	0	0	0	0	0	0	0	0	0	0	0	0	0	0	0	0	0	0	0	0	0	0	0	0	0
Reactome Oxidative Stress Induced Senescence	126	7	0.0556	9.45e-05	0.00279		0	0	0	0	0	0	0	0	0	0	0	0	0	0	0	0	0	0	0	0	0	0	0	0	0	0	0	0	0	0	0	0	0	0	0	0	0	0	0	0	0	0	1
PID Integrin2 Pathway	29	4	0.1379	9.53e-05	0.00279		0	0	0	0	0	0	0	0	1	0	0	0	0	0	0	0	0	0	0	0	0	0	0	0	0	0	0	0	0	0	0	0	0	1	0	0	0	0	0	0	0	0	0
Reactome Negative Regulation of FGFR3 Signaling	29	4	0.1379	9.53e-05	0.00279		0	1	1	0	1	0	0	0	0	0	0	0	0	0	0	0	0	0	0	0	0	0	0	0	0	0	0	0	0	0	0	0	0	0	0	0	0	0	0	0	0	0	0
Reactome Regulation of Cholesterol Biosynthesis By SREBP SREBF	55	5	0.0909	9.63e-05	0.00279		0	0	0	0	0	0	0	0	0	0	0	0	0	0	0	0	0	0	0	0	0	0	0	0	0	0	0	0	0	0	0	0	0	0	0	0	0	0	0	0	0	0	0
Reactome Downstream Signaling of Activated FGFR2	30	4	0.1333	0.000109	0.00313		0	1	1	1	1	0	0	0	0	0	0	0	0	0	0	0	0	0	0	0	0	0	0	0	0	0	0	0	0	0	0	0	0	0	0	0	0	0	0	0	0	0	0
Reactome B Wich Complex Positively Regulates rRNA Expression	91	6	0.0659	0.000117	0.00328		0	0	0	0	0	0	0	0	0	0	0	0	0	0	0	0	0	0	0	0	0	0	0	0	0	0	0	0	0	0	0	0	0	0	0	0	0	0	0	0	0	0	1
Reactome RNA Polymerase I Promoter Escape	91	6	0.0659	0.000117	0.00328		0	0	0	0	0	0	0	0	0	0	0	0	0	0	0	0	0	0	0	0	0	0	0	0	0	0	0	0	0	0	0	0	0	0	0	0	0	0	0	0	0	0	1
Reactome EGFR Downregulation	31	4	0.129	0.000125	0.00339		0	0	0	0	0	1	1	0	0	0	0	0	0	0	0	0	0	0	0	0	0	0	0	0	0	0	0	0	0	0	0	0	0	0	0	0	0	0	0	0	0	0	0
Reactome Negative Regulation of FGFR4 Signaling	31	4	0.129	0.000125	0.00339		0	1	1	0	1	0	0	0	0	0	0	0	0	0	0	0	0	0	0	0	0	0	0	0	0	0	0	0	0	0	0	0	0	0	0	0	0	0	0	0	0	0	0
Reactome Recruitment of NUMA To Mitotic Centrosomes	95	6	0.0632	0.000149	0.004		0	0	0	0	0	0	0	0	0	0	0	0	0	0	0	0	0	0	0	0	0	0	0	0	0	0	0	0	0	0	0	0	0	0	0	0	0	0	0	0	0	0	0
Reactome Erythrocytes Take Up Carbon Dioxide And Release Oxygen	13	3	0.2308	0.000154	0.004		0	0	0	0	0	0	0	0	0	0	0	0	0	0	0	0	0	0	0	0	0	0	0	0	0	0	0	0	0	0	0	0	0	0	0	0	0	0	0	0	0	0	0
Reactome FGFR2C Ligand Binding And Activation	13	3	0.2308	0.000154	0.004		0	1	1	0	1	0	0	0	0	0	0	0	0	0	0	0	0	0	0	0	0	0	0	0	0	0	0	0	0	0	0	0	0	0	0	0	0	0	0	0	0	0	0
Reactome FGFR3 Ligand Binding And Activation	13	3	0.2308	0.000154	0.004		0	1	1	0	1	0	0	0	0	0	0	0	0	0	0	0	0	0	0	0	0	0	0	0	0	0	0	0	0	0	0	0	0	0	0	0	0	0	0	0	0	0	0
Reactome Nuclear Events Kinase And Transcription Factor Activation	61	5	0.082	0.000158	0.00405		0	0	0	0	0	0	0	0	0	0	0	0	0	0	0	0	0	0	0	0	0	0	0	0	0	0	0	0	0	0	0	0	0	0	0	0	0	0	0	0	0	0	0
Reactome FGFR2 Mutant Receptor Activation	33	4	0.1212	0.00016	0.00406		0	1	1	1	1	0	0	0	0	0	0	0	0	0	0	0	0	0	0	0	0	0	0	0	0	0	0	0	0	0	0	0	0	0	0	0	0	0	0	0	0	0	0
Reactome Gene Silencing By RNA	138	7	0.0507	0.000167	0.00418		0	0	0	0	0	0	0	0	0	0	0	0	0	0	0	0	0	0	0	0	0	0	0	0	0	0	0	0	0	0	0	0	0	0	0	0	0	0	0	0	0	0	1
Reactome Runx1 Regulates Genes Involved In Megakaryocyte Differentiation And Platelet Function	98	6	0.0612	0.000177	0.00438		0	0	0	0	0	0	0	0	0	0	0	0	0	0	0	0	0	0	0	0	0	0	0	0	0	0	0	0	0	0	0	0	0	0	0	0	0	0	0	0	0	0	1
PID HDAC Class II Pathway	34	4	0.1176	0.00018	0.00442		0	0	0	0	0	0	0	0	0	0	0	0	0	0	0	0	0	0	0	0	0	0	0	0	0	0	0	0	0	0	0	0	0	0	0	0	0	0	0	0	0	0	0
Reactome DNA Methylation	65	5	0.0769	0.000214	0.00518		0	0	0	0	0	0	0	0	0	0	0	0	0	0	0	0	0	0	0	0	0	0	0	0	0	0	0	0	0	0	0	0	0	0	0	0	0	0	0	0	0	0	1
PID ERBB Network Pathway	15	3	0.2	0.000242	0.00575		0	0	0	0	0	1	1	0	0	0	0	0	0	0	0	0	0	0	0	0	0	0	0	0	0	0	0	0	0	0	0	0	0	0	0	0	0	0	0	0	0	0	0
Reactome Phospholipase C Mediated Cascade FGFR4	15	3	0.2	0.000242	0.00575		0	1	1	0	1	0	0	0	0	0	0	0	0	0	0	0	0	0	0	0	0	0	0	0	0	0	0	0	0	0	0	0	0	0	0	0	0	0	0	0	0	0	0
Reactome Activated PKN1 Stimulates Transcription of AR Androgen Receptor Regulated Genes KLK2 And KLK3	67	5	0.0746	0.000246	0.00579		0	0	0	0	0	0	0	0	0	0	0	0	0	0	0	0	0	0	0	0	0	0	0	0	0	0	0	0	0	0	0	0	0	0	0	0	0	0	0	0	0	0	1
Reactome Cellular Senescence	197	8	0.0406	0.000266	0.00619		0	0	0	0	0	0	0	0	0	0	0	0	0	0	0	0	0	0	0	0	0	0	0	0	0	0	0	0	0	0	0	0	0	0	0	0	0	0	0	0	0	0	1
Reactome Positive Epigenetic Regulation of rRNA Expression	106	6	0.0566	0.000271	0.00623		0	0	0	0	0	0	0	0	0	0	0	0	0	0	0	0	0	0	0	0	0	0	0	0	0	0	0	0	0	0	0	0	0	0	0	0	0	0	0	0	0	0	1
Reactome HSF1 Dependent Transactivation	38	4	0.1053	0.000279	0.00636		0	0	0	0	0	0	0	0	0	0	0	0	0	0	0	0	0	0	0	0	0	0	0	0	0	0	0	0	0	0	0	0	0	0	0	0	0	0	0	0	0	0	0
Reactome Transcriptional Regulation By Small RNAs	107	6	0.0561	0.000285	0.00643		0	0	0	0	0	0	0	0	0	0	0	0	0	0	0	0	0	0	0	0	0	0	0	0	0	0	0	0	0	0	0	0	0	0	0	0	0	0	0	0	0	0	1
Reactome Metabolism of Steroids	151	7	0.0464	0.000289	0.00646		0	0	0	0	0	0	0	0	0	0	0	0	0	0	0	0	0	0	0	0	0	0	0	0	0	0	0	0	0	0	0	0	0	0	0	0	0	0	0	0	0	0	0
							0	0	0	0	0	0	1	0	0	0	0	0	0	0	0	0	0	0	0	1	0	0	0	0	0	0	0	0	0	0	0	0	0	0	0	0	0	0	0	0	0	0	0
*p-value calculated with hypergeometric p-value computed with k, K and 320 genes mapped out of 440 submitted from upregulated differentially expressed by RNAseq, against 38404 genes in MSigDB dataset.						Entrez Gene Id	5154	2247	2246	2252	8823	1839	2069	301	5328	6385	5054	5271	135228	627	3549	652	650	10468	392255	11197	27190	6275	6277	5033	5352	55214	3698	5274	1990	78989	2219	306	6320	3491	22915	1463	176	1310	1490	7130	148113	8839	8353
						Gene Description	platelet derived growth factor subunit A [Source:HGNC Symbol;Acc:HGNC:8799]	fibroblast growth factor 2 [Source:HGNC Symbol;Acc:HGNC:3676]	fibroblast growth factor 1 [Source:HGNC Symbol;Acc:HGNC:3665]	fibroblast growth factor 7 [Source:HGNC Symbol;Acc:HGNC:3685]	fibroblast growth factor 16 [Source:HGNC Symbol;Acc:HGNC:3672]	heparin binding EGF like growth factor [Source:HGNC Symbol;Acc:HGNC:3059]	epiregulin [Source:HGNC Symbol;Acc:HGNC:3443]	annexin A1 [Source:HGNC Symbol;Acc:HGNC:533]	plasminogen activator, urokinase [Source:HGNC Symbol;Acc:HGNC:9052]	syndecan 4 [Source:HGNC Symbol;Acc:HGNC:10661]	serpin family E member 1 [Source:HGNC Symbol;Acc:HGNC:8583]	serpin family B member 8 [Source:HGNC Symbol;Acc:HGNC:8952]	CD109 molecule [Source:HGNC Symbol;Acc:HGNC:21685]	brain derived neurotrophic factor [Source:HGNC Symbol;Acc:HGNC:1033]	Indian hedgehog signaling molecule [Source:HGNC Symbol;Acc:HGNC:5956]	bone morphogenetic protein 4 [Source:HGNC Symbol;Acc:HGNC:1071]	bone morphogenetic protein 2 [Source:HGNC Symbol;Acc:HGNC:1069]	follistatin [Source:HGNC Symbol;Acc:HGNC:3971]	growth differentiation factor 6 [Source:HGNC Symbol;Acc:HGNC:4221]	WNT inhibitory factor 1 [Source:HGNC Symbol;Acc:HGNC:18081]	interleukin 17B [Source:HGNC Symbol;Acc:HGNC:5982]	S100 calcium binding protein A4 [Source:HGNC Symbol;Acc:HGNC:10494]	S100 calcium binding protein A6 [Source:HGNC Symbol;Acc:HGNC:10496]	prolyl 4-hydroxylase subunit alpha 1 [Source:HGNC Symbol;Acc:HGNC:8546]	procollagen-lysine,2-oxoglutarate 5-dioxygenase 2 [Source:HGNC Symbol;Acc:HGNC:9082]	prolyl 3-hydroxylase 2 [Source:HGNC Symbol;Acc:HGNC:19317]	inter-alpha-trypsin inhibitor heavy chain 2 [Source:HGNC Symbol;Acc:HGNC:6167]	serpin family I member 1 [Source:HGNC Symbol;Acc:HGNC:8943]	chymotrypsin like elastase 1 [Source:HGNC Symbol;Acc:HGNC:3308]	collectin subfamily member 11 [Source:HGNC Symbol;Acc:HGNC:17213]	ficolin 1 [Source:HGNC Symbol;Acc:HGNC:3623]	annexin A3 [Source:HGNC Symbol;Acc:HGNC:541]	C-type lectin domain containing 11A [Source:HGNC Symbol;Acc:HGNC:10576]	cellular communication network factor 1 [Source:HGNC Symbol;Acc:HGNC:2654]	multimerin 1 [Source:HGNC Symbol;Acc:HGNC:7178]	neurocan [Source:HGNC Symbol;Acc:HGNC:2465]	aggrecan [Source:HGNC Symbol;Acc:HGNC:319]	collagen type XIX alpha 1 chain [Source:HGNC Symbol;Acc:HGNC:2196]	cellular communication network factor 2 [Source:HGNC Symbol;Acc:HGNC:2500]	TNF alpha induced protein 6 [Source:HGNC Symbol;Acc:HGNC:11898]	cartilage intermediate layer protein 2 [Source:HGNC Symbol;Acc:HGNC:24213]	cellular communication network factor 5 [Source:HGNC Symbol;Acc:HGNC:12770]	H3 clustered histone 6 [Source:HGNC Symbol;Acc:HGNC:4769]
[truncated: 278 more columns]

## Sheet: Supplemental 3B
Supplemental Table 3B: Focused assessment for unfolded protein related pathway genes in differentially expressed up regulated genes
MSigDB Gene Set	k overlaps up	K in set (M)	k/K	p-value*	FDR†
GO Regulation of IRE1 Mediated Unfolded Protein Response	0	12	0	0.904455	0.959024
GO Regulation of PERK Mediated Unfolded Protein Response	0	10	0	0.919722	0.959024
GO Unfolded Protein Binding	9	127	0.0708661	1.29666e-06	1.94499e-05
GO Regulation of Endoplasmic Reticulum Unfolded Protein Response	0	25	0	0.811192	0.959024
Hallmark Unfolded Protein Response	4	113	0.0353982	0.0149861	0.112396
GO Positive Regulation of IRE1 Mediated Unfolded Protein Response	0	7	0	0.943106	0.959024
Reactome Unfolded Protein Response	3	80	0.0375	0.02941	0.14705
Reactome Unfolded Protein Response UPR	3	92	0.0326087	0.0418324	0.156872
GO Positive Regulation of Endoplasmic Reticulum Unfolded Protein Response	0	13	0	0.896916	0.959024
GO PERK Mediated Unfolded Protein Response	1	21	0.047619	0.161181	0.483544
GO Negative Regulation of PERK Mediated Unfolded Protein Response	0	5	0	0.959024	0.959024
GO Negative Regulation of Endoplasmic Reticulum Unfolded Protein Response	0	11	0	0.912057	0.959024
GO IRE1 Mediated Unfolded Protein Response	0	65	0	0.580228	0.959024
GO Endoplasmic Reticulum Unfolded Protein Response	1	122	0.00819672	0.729639	0.959024
GO ATF6 Mediated Unfolded Protein Response	0	10	0	0.919722	0.959024
*p-value calculated with hypergeometric p-value computed with k, K and 320 genes mapped out of 440 submitted from upregulated differentially expressed by RNAseq, against 38404 genes in MSigDB dataset.
† FDR by method of Benjamini and Hochberg (1995)
