# Supplementary material for: Copper-Binding Domain Variation in a Novel Murine Lysyl Oxidase Model Produces Structurally Inferior Aortic Elastic Fibers Whose Failure Is Modified by Age, Sex, and Blood Pressure
Source: Int J Mol Sci. 2022 Jun 17;23(12):6749. doi: 10.3390/ijms23126749 (PMC9223555; doi:10.3390/ijms23126749)
Supplement: Supplementary file 1 [file ijms-23-06749-s001.zip › Supplemental Table S4.xlsx]

## Sheet: Supplemental 4A
Supplemental Table IV: Downregulated Canonical Pathways in Lox+/C285F vs Lox+/+ aortas
Gene set enrichment analysis for Lox +/C285F vs Lox+/+ aortas. Below are the only enriched canonical pathways in the downregulated genes (>1.5X increase, 0.1FDR) meeting at least 0.05 FDR for enrichement by GSEA (13 pathways). At right are the genes in each pathway with genes in each pathway indicated as "1" and non included genes as "0"
Overlap Results
Collection(s):	Canonical Pathways (CP)
# overlaps shown:	13
# genesets in collections:	2232
# genes in comparison (n):	280
# genes in universe (N):	38404
MSigDB Gene Set Name	# Genes in Gene Set (K)	# Genes in Overlap (k)	k/K	p-value*	FDR q-value	Gene Symbol	ADRB2	ADRA1B	ADRA1D	ADRA1A	IGFBP3	BBC3	CDKN1A	SESN1	TP53INP1	ZNF385A	DDIT4	BCL2L11	RARA	NCOR2	PCGF2	USP2	CBX4	RTF1	FOXO1	FOXO6	GLI2	NOTCH1	MAMLD1	CEBPB	POLR2A	CAMK4	NR1D1	PPARGC1B	UPF3B	FKBP5	SETD1B	ZNF717	ZNF703	ADAMTS15	WNT11	ADAM11	CCL27	SEMA6C	SEMA6B	SEMA4B	SEMA4C	CLEC3B	CLEC1A
Reactome Adrenoceptors	9	4	0.4444	3.39e-07	0.000404		1	1	1	1	0	0	0	0	0	0	0	0	0	0	0	0	0	0	0	0	0	0	0	0	0	0	0	0	0	0	0	0	0	0	0	0	0	0	0	0	0	0	0
Reactome RNA Polymerase II Transcription	1375	29	0.0211	3.62e-07	0.000404		0	0	0	0	1	1	1	1	1	1	1	1	1	1	1	1	1	1	1	1	1	1	1	1	1	1	1	1	1	1	1	1	1	0	0	0	0	0	0	0	0	0	0
Naba Matrisome	1026	23	0.0224	2.29e-06	0.0017		0	0	0	0	1	0	0	0	0	0	0	0	0	0	0	0	0	0	0	0	0	0	0	0	0	0	0	0	0	0	0	0	0	1	1	1	1	1	1	1	1	1	1
PID P53 Downstream Pathway	137	8	0.0584	8.02e-06	0.00447		0	0	0	0	1	1	1	1	1	1	1	0	0	0	0	0	0	0	0	0	0	0	0	0	0	0	0	0	0	0	0	0	0	0	0	0	0	0	0	0	0	0	0
Reactome BH3 Only Proteins Associate with and Inactivate Anti-Apoptotic BCL-2 Members	9	3	0.3333	3.12e-05	0.0139		0	0	0	0	0	1	0	0	0	0	0	1	0	0	0	0	0	0	0	0	0	0	0	0	0	0	0	0	0	0	0	0	0	0	0	0	0	0	0	0	0	0	0
Naba Matrisome Associated	751	17	0.0226	4.36e-05	0.0162		0	0	0	0	0	0	0	0	0	0	0	0	0	0	0	0	0	0	0	0	0	0	0	0	0	0	0	0	0	0	0	0	0	1	1	1	1	1	1	1	1	1	1
Reactome Post Translational Protein Modification	1430	25	0.0175	5.61e-05	0.0169		1	0	0	0	1	0	0	0	0	0	0	0	1	1	1	1	1	1	0	0	0	0	0	0	0	0	0	0	0	0	0	0	0	1	0	0	0	0	0	0	0	0	0
Biocarta EGFR SMRTE Pathway	11	3	0.2727	6.06e-05	0.0169		0	0	0	0	0	0	0	0	0	0	0	0	1	1	0	0	0	0	0	0	0	0	0	0	0	0	0	0	0	0	0	0	0	0	0	0	0	0	0	0	0	0	0
Reactome FOXO Mediated Transcription	66	5	0.0758	0.000124	0.0306		0	0	0	0	0	1	1	0	0	0	0	1	0	0	0	0	0	0	1	1	0	0	0	0	0	0	0	0	0	0	0	0	0	0	0	0	0	0	0	0	0	0	0
KEGG Pathways In Cancer	325	10	0.0308	0.000153	0.0341		0	0	0	0	0	0	1	0	0	0	0	0	1	0	0	0	0	0	1	0	1	0	0	0	0	0	0	0	0	0	0	0	0	0	1	0	0	0	0	0	0	0	0
Reactome FOXO Mediated Transcription Of Cell Death Genes	16	3	0.1875	0.0002	0.0395		0	0	0	0	0	1	0	0	0	0	0	1	0	0	0	0	0	0	1	0	0	0	0	0	0	0	0	0	0	0	0	0	0	0	0	0	0	0	0	0	0	0	0
Reactome Signaling By NOTCH1	74	5	0.0676	0.000212	0.0395		0	0	0	0	0	0	0	0	0	0	0	0	0	1	0	0	0	0	0	0	0	1	1	0	0	0	0	0	0	0	0	0	0	0	0	0	0	0	0	0	0	0	0
Reactome Amine Ligand Binding Receptors	42	4	0.0952	0.000249	0.0427		1	1	1	1	0	0	0	0	0	0	0	0	0	0	0	0	0	0	0	0	0	0	0	0	0	0	0	0	0	0	0	0	0	0	0	0	0	0	0	0	0	0	0
*p-value calculated with hypergeometric p-value computed with k, K and 280 genes mapped out of 419 submitted from downregulated differentially expressed by RNAseq, against 38404 genes in MSigDB dataset.						Entrez Gene Id	154	147	146	148	3486	27113	1026	27244	94241	25946	54541	10018	5914	9612	7703	9099	8535	23168	2308	100132074	2736	4851	10046	1051	5430	814	9572	133522	65109	2289	23067	100131827	80139	170689	7481	4185	10850	10500	10501	10509	54910	7123	51267
						Gene Description	adrenoceptor beta 2 [Source:HGNC Symbol;Acc:HGNC:286]	adrenoceptor alpha 1B [Source:HGNC Symbol;Acc:HGNC:278]	adrenoceptor alpha 1D [Source:HGNC Symbol;Acc:HGNC:280]	adrenoceptor alpha 1A [Source:HGNC Symbol;Acc:HGNC:277]	insulin like growth factor binding protein 3 [Source:HGNC Symbol;Acc:HGNC:5472]	BCL2 binding component 3 [Source:HGNC Symbol;Acc:HGNC:17868]	cyclin dependent kinase inhibitor 1A [Source:HGNC Symbol;Acc:HGNC:1784]	sestrin 1 [Source:HGNC Symbol;Acc:HGNC:21595]	tumor protein p53 inducible nuclear protein 1 [Source:HGNC Symbol;Acc:HGNC:18022]	zinc finger protein 385A [Source:HGNC Symbol;Acc:HGNC:17521]	DNA damage inducible transcript 4 [Source:HGNC Symbol;Acc:HGNC:24944]	BCL2 like 11 [Source:HGNC Symbol;Acc:HGNC:994]	retinoic acid receptor alpha [Source:HGNC Symbol;Acc:HGNC:9864]	nuclear receptor corepressor 2 [Source:HGNC Symbol;Acc:HGNC:7673]	polycomb group ring finger 2 [Source:HGNC Symbol;Acc:HGNC:12929]	ubiquitin specific peptidase 2 [Source:HGNC Symbol;Acc:HGNC:12618]	chromobox 4 [Source:HGNC Symbol;Acc:HGNC:1554]	RTF1 homolog, Paf1/RNA polymerase II complex component [Source:HGNC Symbol;Acc:HGNC:28996]	forkhead box O1 [Source:HGNC Symbol;Acc:HGNC:3819]	forkhead box O6 [Source:HGNC Symbol;Acc:HGNC:24814]	GLI family zinc finger 2 [Source:HGNC Symbol;Acc:HGNC:4318]	notch receptor 1 [Source:HGNC Symbol;Acc:HGNC:7881]	mastermind like domain containing 1 [Source:HGNC Symbol;Acc:HGNC:2568]	CCAAT enhancer binding protein beta [Source:HGNC Symbol;Acc:HGNC:1834]	RNA polymerase II subunit A [Source:HGNC Symbol;Acc:HGNC:9187]	calcium/calmodulin dependent protein kinase IV [Source:HGNC Symbol;Acc:HGNC:1464]	nuclear receptor subfamily 1 group D member 1 [Source:HGNC Symbol;Acc:HGNC:7962]	PPARG coactivator 1 beta [Source:HGNC Symbol;Acc:HGNC:30022]	UPF3B regulator of nonsense mediated mRNA decay [Source:HGNC Symbol;Acc:HGNC:20439]	FKBP prolyl isomerase 5 [Source:HGNC Symbol;Acc:HGNC:3721]	SET domain containing 1B, histone lysine methyltransferase [Source:HGNC Symbol;Acc:HGNC:29187]	zinc finger protein 717 [Source:HGNC Symbol;Acc:HGNC:29448]	zinc finger protein 703 [Source:HGNC Symbol;Acc:HGNC:25883]	ADAM metallopeptidase with thrombospondin type 1 motif 15 [Source:HGNC Symbol;Acc:HGNC:16305]	Wnt family member 11 [Source:HGNC Symbol;Acc:HGNC:12776]	ADAM metallopeptidase domain 11 [Source:HGNC Symbol;Acc:HGNC:189]	C-C motif chemokine ligand 27 [Source:HGNC Symbol;Acc:HGNC:10626]	semaphorin 6C [Source:HGNC Symbol;Acc:HGNC:10740]	semaphorin 6B [Source:HGNC Symbol;Acc:HGNC:10739]	semaphorin 4B [Source:HGNC Symbol;Acc:HGNC:10730]	semaphorin 4C [Source:HGNC Symbol;Acc:HGNC:10731]	C-type lectin domain family 3 member B [Source:HGNC Symbol;Acc:HGNC:11891]	C-type lectin domain family 1 member A [Source:HGNC Symbol;Acc:HGNC:24355]
[truncated: 238 more columns]

## Sheet: Supplemental 4B
Supplemental Table 4B: Focused assessment for unfolded protein related pathway genes in differentially expressed down regulated genes
MSigDB Gene Set	k overlaps	K in set (M)	k/K	p-value*	FDR†
GO Regulation of IRE1 Mediated Unfolded Protein Response	1	12	0.0833333	0.0840779	0.272274
GO Regulation of PERK Mediated Unfolded Protein Response	0	10	0	0.929429	0.964071
GO Unfolded Protein Binding	1	127	0.00787402	0.60579	0.908685
GO Regulation of Endoplasmic Reticulum Unfolded Protein Response	1	25	0.04	0.16723	0.418075
Hallmark Unfolded Protein Response	6	113	0.0530973	0.000187308	0.00280962
GO Positive Regulation of IRE1 Mediated Unfolded Protein Response	1	7	0.142857	0.0499373	0.272274
Reactome Unfolded Protein Response	0	80	0	0.556541	0.908685
Reactome Unfolded Protein Response UPR	1	92	0.0108696	0.490346	0.908685
GO Positive Regulation of Endoplasmic Reticulum Unfolded Protein Response	1	13	0.0769231	0.0907579	0.272274
GO PERK Mediated Unfolded Protein Response	0	21	0	0.857521	0.964071
GO Negative Regulation of PERK Mediated Unfolded Protein Response	0	5	0	0.964071	0.964071
GO Negative Regulation of Endoplasmic Reticulum Unfolded Protein Response	0	11	0	0.922651	0.964071
GO IRE1 Mediated Unfolded Protein Response	1	65	0.0153846	0.378763	0.811636
GO Endoplasmic Reticulum Unfolded Protein Response	3	122	0.0245902	0.0601879	0.272274
GO ATF6 Mediated Unfolded Protein Response	0	10	0	0.929429	0.964071
*p-value calculated with hypergeometric p-value computed with k, K and 280 genes mapped out of 419 submitted from downregulated differentially expressed by RNAseq, against 38404 genes in MSigDB dataset.
† FDR by method of Benjamini and Hochberg (1995)
