# Supplementary material for: Copper-Binding Domain Variation in a Novel Murine Lysyl Oxidase Model Produces Structurally Inferior Aortic Elastic Fibers Whose Failure Is Modified by Age, Sex, and Blood Pressure
Source: Int J Mol Sci. 2022 Jun 17;23(12):6749. doi: 10.3390/ijms23126749 (PMC9223555; doi:10.3390/ijms23126749)
Supplement: Supplementary file 1 [file ijms-23-06749-s001.zip › Supplemental Table S5.xlsx]

## Sheet: IPA_upstream_DEseq_058_10
Supplemental Table V: Upstream regulators of the diffentially expressed genes.
Top 30 predicted upstream regulators of differentially expressed genes using Ingeunity Pathway Analysis
Upstream Regulator	Molecule Type	Predicted Activation State	Activation z-score	p-value of overlap	Target Molecules in Dataset
dexamethasone	chemical drug	Inhibited	-3.882	3.9e-29	A4GALT,ABCA1,ADAMTS15,ADM,ADRB2,ANKRD1,ANXA1,ANXA3,ARL4C,ATF3,ATN1,BBC3,BCL2L11,BCL9L,BDKRB2,BDNF,BMP2,BTG1,CA2,CCN1,CCN2,CCNA2,CD46,CD83,CDC42EP3,CDKN1A,CDKN2B,CEBPB,CISH,CLEC11A,CYP1B1,CYP51A1,DACH1,DAPK1,DDIT4,DEPP1,DHRS9,DLK1,DUSP4,DUSP5,DUT,EGR1,EGR2,EIF1AX,EPB41L4B,EREG,ERLIN1,ETV5,FAM107A,FAM111A,FBXO30,FGF1,FGF2,FGF7,FILIP1L,FKBP5,FOS,FOSB,FOSL2,FOXO1,FST,GADD45B,GAS1,GFOD1,GJA1,GLI1,GLUL…
TGFB1	growth factor	Activated	2.744	4.45e-29	ABCA1,ABCG1,ABLIM3,Acan,ADM,ADRA1D,ALDH5A1,AMD1,AMOTL2,ANKRD1,AOPEP,APLNR,BAMBI,BBC3,BCL2L11,BDKRB2,BDNF,BMF,BMP2,BMP4,BTG1,BUB1B,CBFA2T3,CCL27,CCN1,CCN2,CCN5,CCNA2,CD46,CD83,CDC42EP3,CDK1,CDKN1A,CDKN2B,CEBPB,CELSR2,CSRP2,DACH1,DAPK1,DDIT4,DNAJA1,DNAJB4,DUSP4,DYNLL1,EGR1,EGR2,EPHA2,EREG,FAM107A,FAS,FGF2,FGF7,FILIP1L,FNDC5,FOS,FOSB,FOSL2,FOXO1,FXYD5,FZD8,GADD45B,GAS1,GDF6,GJA1,GLI1,GLI2,GPR146,GPR…
beta-estradiol	chemical - endogenous mammalian		1.84	1.63e-26	A4GALT,ABCA1,ADM,ADRB2,AMOTL2,ANXA1,ANXA3,ATF3,BAMBI,BAZ1A,BBC3,BCL2L11,BDNF,BMP2,BMP4,BTG1,C2orf88,CA2,CAMK4,CBFA2T3,CCN1,CCN2,CCN5,CCNA2,CDK1,CDKN1A,CDKN2B,CEBPB,CLDN3,CYP1B1,CYP51A1,DDIT4,DHRS9,DRD1,DUSP4,DUSP5,DUSP6,DYNLL1,EGR1,EGR2,EREG,FAM107A,FAM111A,FAS,FGF1,FGF2,FGF7,FHL2,FMO5,FNDC5,FOS,FOSB,FOSL2,FOXO1,FST,FXYD5,GADD45B,GIPC2,GJA1,GLI2,HBA1/HBA2,HBEGF,HLA-A,HMGCS1,HMMR,HOMER1,HSD17B12,H…
TP53	transcription regulator		-0.609	1.07e-21	ADRA1A,ADRB2,AMOTL2,ANKRD1,ANXA1,ANXA3,ARAP2,ATF3,BBC3,BCL2L11,BDKRB2,BDNF,BMF,BTG1,BUB1B,CCN1,CCN2,CCN5,CCNA2,CDC42EP3,CDK1,CDKN1A,CEBPB,CGREF1,CYP51A1,DAPK1,DDIT4,DHRS9,DNAJA4,DNAJB2,DNAJB4,DUSP4,DUSP5,DUSP6,DUT,EGR1,EGR2,EPHA2,FAS,FDPS,FGF2,FGF7,FHL2,FKBP5,FOS,FOXF1,FOXO1,GADD45B,GAS1,GJA1,GLI2,GLUL,GPR176,HBEGF,HDAC9,HMGCS1,HMMR,HSP90AA1,HSPA1A/HSPA1B,HSPA4L,HSPA8,HSPH1,IER3,IER5,IGF2,IGFBP3,…
PDGF BB	complex	Activated	3.398	2.64e-20	ADM,ADRA1D,ADRB2,ATF3,BDKRB2,BMP4,CBX4,CCN1,CCN2,CDK1,CDKN1A,CEBPB,CSRP2,DUSP5,DUSP6,EGR1,EGR2,EREG,FGF2,FGF7,FHL2,FOS,FOSB,FXYD5,GJA1,GLUL,HBEGF,HMGCS1,IER3,IGF2,KLF10,KLF6,MCM6,mir-24,NFIL3,NOX4,NR4A3,PCGF2,PDGFA,PLAU,PTGS2,RGS2,RND3,SERPINE1,TNFRSF12A,TOB1,VCAM1
TNF	cytokine	Activated	2.985	2.71e-17	A4GALT,ABCA1,Acan,ADM,ADRB2,ANXA1,ATF3,BAMBI,BBC3,BCL2L11,BDKRB2,BDNF,BMP2,BMP4,BTG1,BUB1B,CA2,CCL27,CCN1,CCN2,CCN5,CD83,CDKN1A,CEBPB,CISH,CLEC11A,CRY1,CYP1B1,DEPP1,DUSP4,DUSP5,DUSP6,EGR1,EGR2,EPHA2,EREG,ETV5,FAS,FDPS,FGF2,FOS,FOSB,FOSL2,FOXF1,FOXO1,FST,GADD45B,GASK1B,GFRA2,GJA1,GPR176,HBEGF,HDAC9,HLA-A,HSPA1A/HSPA1B,HSPA8,IER3,IFIT1B,IFIT3,IGF2,IGFBP3,IRF7,KLF10,KLF6,MAFF,MCAM,MEOX2,MMD,MNT,MST1…
Vegf	group	Activated	3.494	3.56e-16	ADGRG1,ANGEL1,APLNR,ATF3,BAG2,BCL2L11,BMP2,BUB1B,CA2,CCN1,CD46,CDK1,CRY1,DUSP4,DUSP5,DUSP6,EGR1,ETV5,FAS,FGF16,FGF2,FKBP5,FOSB,FST,GASK1B,HBEGF,HMMR,HOMER1,IGFBP3,IHH,MEOX2,MPHOSPH10,NOTCH1,NR4A3,PDGFA,PLAU,PLAUR,PLOD2,PPP1R1B,PRC1,PTGS2,RCAN1,RGS2,SELE,SMC2,STC1,STIL,TNFRSF11B,TPX2,TRIB2,VCAM1,VWF
IFNG	cytokine	Activated	2.606	1.82e-15	ABCA1,ABLIM3,ADGRG1,ADM,ARAP2,ATF3,BBC3,BCL2L11,BDNF,BMF,BTG1,BUB1B,CAMK4,CCN2,CCNA2,CD83,CDK1,CDKN1A,CDKN2B,CEBPB,CELSR2,CIRBP,CISH,DAPK1,DEPP1,DUSP4,DUSP5,EGR1,EGR2,FAM107A,FAS,FGF1,FGF2,FHL2,FKBP5,FOS,FOSB,FOXO1,GJA1,GLUL,GPR146,Gvin1 (includes others),H2AC7,HBEGF,HDAC9,HLA-A,HMGCS1,HSP90AA1,HSPA1A/HSPA1B,HSPA8,IER3,Ifi47,IFIT1B,IFIT3,IRF7,KLF10,KLF6,LGALS3BP,LIX1,MAFF,Ms4a4b (includes others)…
NR3C1	ligand-dependent nuclear receptor	Inhibited	-2.114	1.9e-15	ABCA1,ACTN2,ADM,ADRA1D,ANXA1,BAG2,BCL2L11,BDNF,BMF,BMP2,BTG1,CBX4,CCN1,CD83,CDC42EP3,CDKN1A,CEBPB,DDIT4,DUSP4,DUT,DYNLL1,EGR1,EPB41L4B,FKBP5,FOS,FOXO1,GADD45B,GAS1,GLUL,HSD17B12,IER3,IFIT1B,KLF13,LPIN1,LYST,MALT1,MKNK2,NFIL3,NFKBIA,OAT,PDGFA,PER1,PFKFB3,PIM3,PLA2G4A,PTGS2,RGS2,RNF11,SELE,SERPINE1,SIAH2,SLC25A33,TCIM,Tgtp1/Tgtp2,THAP1,TNFAIP6,TNFRSF10A,TNFRSF11B,TNFRSF12A,TNFRSF21,VCAM1
ESR1	ligand-dependent nuclear receptor		1.881	2.4e-15	ANXA3,ATF3,BCL2L11,BDNF,BMP2,BMP4,BUB1B,CA2,CCN1,CCN5,CCNA2,CD83,CDC42EP3,CDK1,CDKN1A,CDKN2B,CEBPB,CELSR2,CEP250,CYP1B1,DDIT4,DUSP4,DUSP5,EEF2K,EGR1,ENAH,EREG,FAS,FOS,FOSB,FOSL2,FOXO1,FST,GADD45B,GJA1,GLI2,HBA1/HBA2,HBEGF,HSP90AA1,HSPH1,IER3,IGF2,IGFBP3,LATS2,LGALS3BP,LYPD1,MMD,MST1,NEDD9,NFKBIA,NOTCH1,NR1D1,NUP35,P2RY2,PBK,PCDH18,PCGF2,PDE7A,PDK4,PDLIM5,PLAU,PLAUR,PLOD2,POR,PRSS23,PTGER3,PTGS2,R…
F2	peptidase	Activated	4.467	4.32e-15	CCN1,CCN2,CCNA2,CDKN1A,DHRS9,EGR1,ELL2,EREG,FGF2,FOS,FOSB,FOSL2,HBEGF,HDAC9,HSP90AA1,IER3,KLF6,LBH,LMCD1,NFKBIA,NR4A3,PDGFA,PLA2G4A,PLAUR,PPIF,PTGS2,RAB3A,RCAN1,SDC4,SELE,SERPINE1,TAGLN2,TENT5A,TNFRSF12A,VCAM1,VWF
CG	complex	Activated	2.816	4.91e-15	ADH7,ADM,APLNR,BDNF,BMP2,BTG1,CAMK4,CBFA2T3,CDKN1A,CEBPB,DUSP6,EGR1,EREG,FAS,FJX1,FOS,FOSL2,FST,GAS1,GASK1B,GJA1,HLA-A,IER3,IFIT3,IGFBP3,LGALS3BP,MCAM,mir-143,Oasl2,PFKFB3,PLAU,PLAUR,PTGS2,RGS2,RGS4,S100A6,SDC4,SPRY2,STC1,TIMP4,TNFAIP6,TNFRSF12A
LY294002	chemical - kinase inhibitor	Inhibited	-3.203	7.33e-15	ABCA1,ADRB2,ATF3,BBC3,BCL2L11,BDNF,BMP2,BUB1B,CCN1,CCN2,CCNA2,CD83,CDKN1A,CDKN2B,CEBPB,DUSP4,DUSP6,EGR1,EGR2,EIF1AX,EREG,FAS,FGF2,FGF7,FOS,FOSB,FOXO1,GJA1,HBEGF,HMGCS1,IER3,IGF2,IGFBP3,KLF10,NFKBIA,NR4A3,PLAU,PTGS2,RAB3A,RGS2,RND3,SATB1,SERPINE1,SMC2,SPRY1,SPRY2,SQLE,TRIB2,VAMP1,VCAM1,ZBTB16
IL1B	cytokine	Activated	3.407	1.74e-14	A4GALT,Acan,ADM,ADRB2,ANXA1,ATF3,BAMBI,BBC3,BMF,BMP2,BMP4,CCL27,CCN2,CD83,CDKN1A,CEBPB,CISH,DACH1,DDIT4,DUSP5,EGR1,FAS,FGF2,FGF7,FKBP5,FOS,FOSB,FOXO1,FST,GADD45B,GJA1,HBEGF,HLA-A,HOMER1,HSPA1A/HSPA1B,IER3,Ifi47,IFIT1B,IFIT3,IGFBP3,IRF7,KLF10,NFIL3,NFKBIA,NOTCH1,NR1D1,NR4A3,PIM3,PLA2G4A,PLAU,PLK3,PPARGC1B,PTGS2,RARA,RCAN1,RSAD2,S100A6,SCX,SDC4,SELE,SERPINE1,SESN1,SOCS1,TCIM,Tgtp1/Tgtp2,TIMP4,TLR4,…
forskolin	chemical toxicant		0.858	3.1e-14	ABCA1,Acan,ADGRG1,ADM,ARL4C,ATF3,BAMBI,BCL2L11,BDNF,CCN2,CDKN1A,CDKN2B,CEBPB,CGREF1,CHRNA1,CYP1B1,DAPK1,DDIT4,DUSP6,EGR1,ELL2,EREG,FAS,FKBP5,FOS,FOSB,FOSL2,FOXO1,FST,GADD45B,GJA1,GLI1,HILPDA,HOMER1,HSPA1A/HSPA1B,IER3,IGF2,IGFBP3,MMD,NFIL3,NFKBIA,NPTX2,NR4A3,PDK4,PER1,PIM3,PLAU,PTGS2,RANGAP1,RGS2,RGS4,SERPINE1,Sik1,SLC24A4,SMIM3,STC1,SYT4,TAGLN2,TNFAIP6,TNFRSF11B
HTT	transcription regulator		-0.27	4.74e-14	ABCA1,ABCC10,ACTN2,AMD1,ATF3,B3GNT2,BAIAP2,BBC3,BCL2L11,BDNF,CA4,CAMK4,CCN2,CDKN1A,CEBPB,CHRNA1,CYP51A1,DRD1,DUSP5,DUSP6,EGR1,EGR2,FDPS,FGF1,FOS,GLUL,HBA1/HBA2,HBEGF,HMGCS1,HOMER1,Hspa1b,HSPA8,IGF2,KCNK3,MCAM,MYL4,NFIC,NFIL3,OAT,PDK2,PER1,PLAUR,POLR2A,POR,PPARGC1B,PPP1R1B,RARA,RASD2,RGS4,SATB1,SESN1,Sik1,SMC2,SNN,TBX6,TNNT3,UCHL1,USP2,VAMP1,VCAM1
NUPR1	transcription regulator		0.866	8.64e-14	ACTR3B,ADGRG1,ADM,ADRB2,ALDH5A1,ANGEL1,ATF3,BCL9,BTG1,BUB1B,CCN1,CCNA2,CDCA2,CEBPB,DHTKD1,DUSP5,ELL2,EREG,FAM111A,FGF1,FHL2,FZD8,H2AC12,H2AC14,H2AC17,H3C13,HBEGF,HILPDA,HOXB5,IGF2BP3,JADE2,KLF6,MKKS,MMD,NFIL3,NR1D1,PFKFB3,PLK3,PRAG1,PRR12,PXDC1,SERPINE1,SIX4,SPC24,SPC25,STIL,TANGO6,TOB1
HRAS	enzyme		0.326	1.08e-13	Acan,ADM,AMOTL2,ANKRD1,ANXA3,BCL2L11,BMP4,CCL27,CCN1,CCN2,CCNA2,CDK1,CDKN1A,CDKN2B,CEBPB,CGREF1,CISH,CSRP2,DUSP6,EGR1,ETV5,FAS,FGF2,FOS,FOSB,FOSL2,FOXO1,GJA1,GRWD1,HSP90AA1,HSPA8,IGF2,KLF6,LATS2,LSP1,MCAM,NCOR2,NFKBIA,NOTCH1,OSBP2,PDGFA,PDLIM5,PLA2G4A,PLAAT1,PLAU,PLAUR,PLOD2,PRSS23,PTGS2,S100A4,SERPINE1,SESN1,SPRY2,SPRY4,SQLE,TNFRSF10A
PD98059	chemical - kinase inhibitor	Inhibited	-4.72	1.5e-13	ABCA1,AMD1,ANKRD1,ANXA1,ATF3,BBC3,BCL2L11,BDNF,BMP2,CA2,CCN2,CCN5,CCNA2,CD83,CDKN1A,CDKN2B,CEBPB,CYP1B1,DUSP4,DUSP5,DUSP6,EGR1,EGR2,EREG,FAS,FGF2,FKBP5,FOS,FOSB,GJA1,HBEGF,IER3,IGF2,IGFBP3,MMD,PDGFA,PER1,PLA2G4A,PLAU,PLAUR,PTGS2,S100A4,SELE,SERPINE1,SPRY2,SQLE,ST5,STC1,TNFRSF10A,TUBB2A,VCAM1
SMAD4	transcription regulator	Activated	2.157	1.84e-13	Acan,BBC3,BMP2,BMP4,CCN2,CDC42EP3,CDKN1A,CDKN2B,DAPK1,EREG,FOS,FST,GADD45B,GJA1,GLI1,IER3,IHH,IL17B,KLF15,LOC102724788/PRODH,mir-143,NFKBIA,PAK3,PLAU,POR,PTGS2,SELE,SERPINE1,SERTAD1,TBX6,TNFAIP6,TNFRSF10A
FOXO3	transcription regulator		0.427	2.8e-13	Acan,ANXA1,ANXA3,BBC3,BCL2L11,BMP2,BTG1,BUB1B,CCN1,CCN2,CDC42EP3,CDKN1A,CDKN2B,DDIT4,DEPP1,EGR1,EGR2,ENPEP,FOS,FOSB,FOXO1,GADD45B,GLUL,IER3,MCAM,MTHFD2,NFKBIA,PBK,PIK3IP1,PLAU,SATB1,SERPINE1,SESN1,SIX4,TCIM,TP53INP1,TPX2,VCAM1
EGF	growth factor	Activated	4.43	2.92e-13	ATF3,BBC3,CCL27,CCN1,CCN2,CDK1,CDKN1A,CEBPB,CISH,CLDN3,DUSP4,DUSP5,DUSP6,EGR1,EGR2,ENAH,EPHA2,EREG,FGF2,FOS,FOSB,FST,GAS1,GJA1,HBEGF,HMGCS1,HOXB5,IER3,IGF2,IGFBP3,KLF10,mir-24,MST1,NCAN,NOTCH1,NR4A3,PBK,PDK4,PER1,PLAU,PLAUR,PTGS2,S100A4,SERPINE1,SLC9A2,SPRY2,SPRY4,TNFRSF12A,VCAM1
cycloheximide	chemical reagent		0.041	3.55e-13	Acan,ADM,ADRA1B,BDNF,CCN1,CCN2,CDKN1A,CEBPB,DDIT4,EGR1,FAS,FGF2,FOS,FOSB,FOSL2,FST,GADD45B,GJA1,HBEGF,IGF2,IRF7,KDM6B,NFKBIA,PDGFA,PFKFB3,PLAU,PLAUR,PTGS2,RCAN1,RGS2,RSAD2,SELE,SERPINE1,Tgtp1/Tgtp2,TNFAIP6,TNFRSF10A,TNFRSF11B,TOB1,TRA2A,VCAM1
CSF2	cytokine	Activated	2.39	3.92e-13	ABCA1,ABCG1,ANXA1,BBC3,BCL2L11,BUB1B,CA4,CCNA2,CD83,CDCA2,CDK1,CDKN1A,CDKN2B,CISH,DUSP6,EGR1,EGR2,FAS,FBXO31,FOLR2,FOS,HAUS8,HBEGF,HILPDA,HSPH1,IER3,KNTC1,MCM6,MMD,NET1,NFKBIA,NR4A3,NUSAP1,PIM3,PLAU,PLAUR,PPIF,PRC1,PTGS2,RACGAP1,RARA,SMC2,SOCS1,SPC25,TLR4,TPX2,TRIB2,VTCN1
lipopolysaccharide	chemical drug	Activated	5.229	6.54e-13	ABCA1,ABCG1,ADM,ADRB2,ANXA1,ANXA3,APLNR,Apol11b (includes others),ARL4C,ATF3,BAMBI,BCL2L11,BDNF,BMP2,BMP4,BTG1,CBFA2T3,CCN1,CCN2,CCR9,CD46,CD83,CDC42EP3,CDKN1A,CEBPB,CISH,DDIT4,DUSP4,DUSP5,EGR1,EGR2,ELL2,EREG,ETV5,FAS,FGF2,FOS,FOSB,FOXO1,FST,GADD45B,GAS1,GJA1,HBEGF,HDAC9,HLA-A,HSPA1A/HSPA1B,HSPA4L,HSPA8,IER3,Ifi47,IFIT1B,IFIT3,IGFBP3,IL17B,IL20RB,IRF7,ITIH2,KLF10,KLF6,LGALS3BP,LPIN1,MAFF,MALT1,MA…
NRG1	growth factor	Activated	2.573	8.18e-13	ABCA1,AMOTL2,ANKRD1,CCN1,CCN2,CDKN1A,DNAJB2,DUSP4,DUSP6,EGR1,EGR2,EPHA2,ETV5,FGF1,FGF2,FOS,FOSB,HMMR,IER3,IGF2,MST1,MYBPC3,NCOR2,NOTCH1,NR4A3,PDGFA,PLAU,PLAUR,PTGS2,RAB3A,SELE,SERPINE1,TOB2
NFkB (complex)	complex	Activated	2.075	1.42e-12	ABCG1,ADM,ANKRD1,ATF3,BAG2,BAMBI,BBC3,BDNF,BMP2,CCN1,CCN2,CD83,CDKN1A,CEBPB,CGREF1,DUSP5,EGR1,ELL2,FAS,FGF1,FGF2,FOS,FOXF1,FST,GADD45B,GLI2,HDAC9,HIF3A,HLA-A,IER3,IRF7,KDM6B,LSP1,NFKBIA,NOTCH1,NR1D1,P2RY2,PIM3,PLAU,PLK3,PPIF,PTGS2,RSAD2,SDC4,SELE,SERPINE1,SLC7A5,SOCS1,TENT5A,TLR4,TNFAIP6,TNFRSF11B,VCAM1
U0126	chemical - kinase inhibitor	Inhibited	-3.689	2.9e-12	Acan,APLNR,ATF3,BCL2L11,BDNF,CCN2,CCN5,CDC42EP3,CDKN1A,CEBPB,CELSR2,CYP1B1,DUSP4,DUSP5,DUSP6,EEF1E1,EGR1,EIF1AX,EPHA2,EREG,ETV5,FGF2,FKBP5,FOS,FOSB,GADD45B,GJA1,GRAMD1B,HBEGF,IER3,IHH,KDM6B,KLF10,NR4A3,PER1,PLA2G4A,PLAU,PLAUR,PTGS2,RND3,SERPINE1,SOCS1,SPRY1,STC1,STC2,TNFRSF11B,VCAM1
PGR	ligand-dependent nuclear receptor		0.547	3.05e-12	AMD1,BTG1,CCN5,CDK1,CDKN1A,CEBPB,DNAJB4,DYNLL1,EIF1AX,ELL2,FKBP5,FOS,FOXO1,GLUL,HBA1/HBA2,HBEGF,IER3,MPHOSPH10,NEDD9,NET1,NFKBIA,P2RY2,PDGFA,PFKFB3,PLAU,PPIF,PTGS2,S100A6,SERPINB8,SLC7A5,SPRY2,STC1,TNFRSF21
HGF	growth factor	Activated	2.978	3.53e-12	ADGRG1,ATF3,BAG2,BMP2,BUB1B,CCN1,CCN2,CD46,CDK1,CDKN1A,CDKN2B,CRY1,DUSP4,DUSP6,DYNLL1,EGR1,FGF16,FGF7,FKBP5,FOS,FOSB,HBEGF,HMMR,HOMER1,IGFBP3,MEOX2,MPHOSPH10,NR4A3,PDGFA,PLAU,PLAUR,PRC1,PTGS2,RGS2,SERPINE1,SMC2,SPRY2,STC1,STIL,TAGLN2,TMEM97,TNFAIP6,TPX2,TRIB2,VCAM1
¬© 2000-2020 QIAGEN. All rights reserved.
